# Supplementary material for: Global mitigation efforts should prioritize support to the emerging emitters
Source: Research Square preprint supplement (doi:10.21203/rs.3.rs-376475/v1), 2021-04-09
Supplement: Supplementary file 2 [file 1565558b33a7c50ade07a90a.xlsx]

## Sheet: 59EmergingEmitters
Country	Country
Lao People's Dem. Rep.	Kenya
Myanmar	Uganda
Zambia	Qatar
Mozambique	Pakistan
Tajikistan	Turkey
Nepal	Indonesia
Botswana	Mongolia
Cambodia	Algeria
Ethiopia	Jordan
Sri Lanka	Iraq
Georgia	Ghana
Cote d'Ivoire	Eritrea
Tanzania	Azerbaijan
Philippines	Namibia
Dem. Rep. Congo	Armenia
Mali	Colombia
Haiti	Sudan
Bolivia	United Arab Emirates
Paraguay	Saudi Arabia
Nigeria	Chile
Rep. Congo	Honduras
Niger	Morocco
Bangladesh	Cameroon
Kyrgyzstan	Angola
Oman	Turkmenistan
Guatemala	Nicaragua
Vietnam	Peru
Senegal	South Sudan
Benin	Egypt
Lebanon
