# Supplementary material for: Global mitigation efforts should prioritize support to the emerging emitters
Source: Research Square preprint supplement (doi:10.21203/rs.3.rs-376475/v1), 2021-04-09
Supplement: Supplementary file 4 [file ef7ead0b6be97c139955fd8b.xlsx]

## Sheet: Intro
	COVID lockdown scenario setting
	DIMENSION	Baseline	Mild lockdown	Default lockdown	Severe lockdown
	Number of lockdowns	0	2	4	8
	Duration	-	Tmild	Tdefault	Tsevere
	Strictness	-	Smild	Sdefault	Ssevere
	Post-COVID scenario setting
	low carbon setting\COVID lockdown setting	No COVID	Mild lockdown for COVID	Default lockdown for COVID	Severe lockdown for COVID
	No policy	Baseline	Mild_NP	WeakPolicy	Severe_NP
	Low Carbon	NoC_LC	Mild_LC	LowCarbon	Severe_LC
	Extreme Low Carbon	NoC_eLC	Mild_eLC	ExtremeLC	Severe_eLC
	Baseline, WeakPolicy, LowCarbon, and ExtremeLC are presented in the main text.
	For detailed information about the scenario settings, see SI section 2.1.3 and 2.2.
	CO2 emissions data provided in this file are all in Mt (10^6 tonne CO2).

## Sheet: Baseline_2025-2040
Country	2025	2026	2027	2028	2029	2030	2031	2032	2033	2034	2035	2036	2037	2038	2039	2040
Algeria	140.122	142.201	144.279	146.357	148.435	150.513	153.065	155.617	158.169	160.721	163.274	165.826	168.378	170.93	173.482	176.034
Angola	18.9866	19.8756	20.7645	21.6535	22.5425	23.4314	25.3994	27.3675	29.3355	31.3035	33.2715	35.2396	37.2076	39.1756	41.1436	43.1116
Armenia	6.51161	6.47513	6.43865	6.40216	6.36568	6.3292	6.30432	6.27945	6.25458	6.2297	6.20483	6.17995	6.15508	6.1302	6.10533	6.08045
Azerbaijan	30.4725	30.2989	30.1254	29.9519	29.7783	29.6048	29.7315	29.8583	29.985	30.1117	30.2385	30.3652	30.492	30.6187	30.7454	30.8722
Bangladesh	133.99	138.978	143.967	148.955	153.944	158.932	171.888	184.843	197.798	210.753	223.708	236.663	249.618	262.573	275.528	288.483
Benin	8.44884	8.84442	9.23999	9.63557	10.0312	10.4267	11.3025	12.1782	13.054	13.92	14.7856	15.6511	16.5167	17.3822	18.2477	19.1133
Bolivia	28.2927	28.735	29.1772	29.6195	30.0617	30.504	30.9194	31.3347	31.7501	32.1655	32.5808	32.9962	33.4116	33.827	34.2423	34.6577
Botswana	9.50466	9.92041	10.3362	10.7519	11.1677	11.5834	12.3517	13.1201	13.8884	14.6568	15.4251	16.1934	16.9618	17.7301	18.4984	19.2668
Cambodia	15.4448	15.3801	15.3155	15.2509	15.1863	15.1217	15.468	15.8144	16.1608	16.5072	16.8535	17.1999	17.5463	17.8927	18.239	18.5854
Cameroon	7.10352	7.39325	7.68299	7.97272	8.26246	8.55219	9.17913	9.80607	10.433	11.06	11.6869	12.3138	12.9408	13.5677	14.1947	14.8216
Chile	95.6227	96.2769	96.9311	97.5853	98.2395	98.8937	99.6571	100.42	101.184	101.947	102.711	103.474	104.238	105.001	105.764	106.528
Colombia	89.5701	92.1302	94.6904	97.2505	99.8107	102.371	106.137	109.903	113.67	117.436	121.202	124.968	128.735	132.501	136.267	140.033
Cote d'Ivoire	12.5682	13.0555	13.5427	14.03	14.5172	15.0045	16.0522	17.0998	18.1475	19.1951	20.2428	21.2905	22.3381	23.3858	24.4334	25.4811
Dem. Rep. Congo	2.59113	2.71663	2.84214	2.96764	3.09315	3.21865	3.48746	3.75627	4.02508	4.29388	4.56269	4.8315	5.10031	5.36911	5.63792	5.90673
Egypt	263.03	266.546	270.063	273.579	277.095	280.612	287.261	293.909	300.558	307.207	313.855	320.504	327.153	333.801	340.45	347.099
Eritrea	1.00645	1.05378	1.10111	1.14844	1.19577	1.24311	1.3482	1.4533	1.5584	1.6635	1.76859	1.87369	1.97879	2.08388	2.18898	2.29408
Ethiopia	19.5185	20.3914	21.2643	22.1371	23.01	23.8829	25.7421	27.6012	29.4604	31.3195	33.1787	35.0379	36.897	38.7562	40.6154	42.4745
Georgia	11.3385	11.0604	10.7822	10.5041	10.226	9.94788	10.0223	10.0968	10.1712	10.2457	10.3201	10.3946	10.469	10.5435	10.618	10.6924
Ghana	18.5559	19.3679	20.18	20.992	21.8041	22.6162	24.3929	26.1697	27.9464	29.7232	31.4999	33.2767	35.0534	36.8301	38.6069	40.3836
Guatemala	18.1727	18.6017	19.0307	19.4598	19.8888	20.3178	20.6126	20.9074	21.2022	21.497	21.7918	22.0866	22.3813	22.6761	22.9709	23.2657
Haiti	3.22932	3.24949	3.26966	3.28984	3.31001	3.33018	3.35905	3.38792	3.41679	3.44566	3.47453	3.5034	3.53226	3.56113	3.59	3.61887
Honduras	9.64917	9.8583	10.0674	10.2766	10.4857	10.6948	10.8295	10.9642	11.0989	11.2336	11.3683	11.503	11.6377	11.7723	11.907	12.0417
Indonesia	722.49	736.279	750.069	763.858	777.648	791.437	808.79	826.142	843.495	860.848	878.2	895.553	912.906	930.258	947.611	964.964
Iraq	180.188	185.582	190.975	196.369	201.763	207.157	211.929	216.702	221.474	226.246	231.018	235.79	240.562	245.335	250.107	254.879
Jordan	23.0811	23.7764	24.4717	25.167	25.8623	26.5576	27.1525	27.7473	28.3422	28.937	29.5319	30.1267	30.7216	31.3164	31.9113	32.5061
Kenya	19.7682	20.6938	21.6193	22.5449	23.4704	24.396	26.445	28.494	30.5431	32.5921	34.6412	36.6902	38.7392	40.7883	42.8373	44.8863
Kyrgyzstan	12.8098	13.0809	13.352	13.6231	13.8942	14.1653	14.3129	14.4605	14.6081	14.7557	14.9033	15.0509	15.1986	15.3462	15.4938	15.6414
Lao People's Dem. Rep.	21.7673	21.6762	21.5851	21.4941	21.403	21.3119	21.8001	22.2883	22.7764	23.2646	23.7528	24.2409	24.7291	25.2173	25.7054	26.1936
Lebanon	32.0962	32.5756	33.0551	33.5345	34.0139	34.4933	34.7261	34.959	35.1918	35.4246	35.6574	35.8903	36.1231	36.3559	36.5887	36.8216
Mali	5.65566	5.93621	6.21676	6.49731	6.77785	7.0584	7.6697	8.28099	8.89228	9.50357	10.1149	10.7262	11.3375	11.9487	12.56	13.1713
Mongolia	31.2642	32.01	32.7557	33.5015	34.2473	34.9931	34.6012	34.2093	33.8174	33.4256	33.0337	32.6418	32.2499	31.858	31.4662	31.0743
Morocco	63.282	63.9463	64.6105	65.2747	65.939	66.6032	67.2271	67.851	68.475	69.0989	69.7228	70.3467	70.9706	71.5945	72.2184	72.8424
Mozambique	6.65634	6.94175	7.22716	7.51257	7.79798	8.08339	8.69733	9.31128	9.92522	10.5392	11.1531	11.7671	12.381	12.9949	13.6089	14.2228
Myanmar	52.8767	55.6152	58.3537	61.0922	63.8307	66.5692	69.551	72.5328	75.5146	78.4964	81.4782	84.4601	87.4419	90.4237	93.4055	96.3873
Namibia	4.87205	5.05752	5.243	5.42848	5.61396	5.79944	6.17516	6.55558	6.94259	7.3296	7.71661	8.10362	8.49063	8.87764	9.26465	9.65166
Nepal	19.7555	20.1883	20.6211	21.0539	21.4868	21.9196	22.6874	23.4553	24.2232	24.9911	25.759	26.5269	27.2947	28.0626	28.8305	29.5984
Nicaragua	5.06537	5.16094	5.25651	5.35208	5.44765	5.54322	5.6158	5.68837	5.74118	5.79019	5.83921	5.88823	5.93724	5.98626	6.03527	6.08429
Niger	2.59575	2.74275	2.88974	3.03673	3.18372	3.33071	3.68293	4.03515	4.38738	4.7396	5.09182	5.44404	5.79627	6.14849	6.50071	6.85294
Nigeria	130.159	136.488	142.816	149.144	155.473	161.801	176.367	190.932	205.497	220.062	234.628	249.193	263.758	278.324	292.889	307.454
Oman	73.2147	75.0992	76.9838	78.8684	80.7529	82.6375	84.1355	85.6335	87.1316	88.6296	90.1276	91.6257	93.1237	94.6217	96.1197	97.6178
Pakistan	304.844	311.143	317.441	323.74	330.039	336.337	347.302	358.267	369.231	380.196	391.161	402.126	413.09	424.055	435.02	445.984
Paraguay	10.655	10.9847	11.3143	11.644	11.9736	12.3033	12.5723	12.8413	13.1104	13.3794	13.6484	13.9175	14.1865	14.4555	14.7246	14.9936
Peru	58.3694	59.2818	60.1942	61.1066	62.019	62.9314	63.7883	64.6452	65.5022	66.3591	67.216	68.073	68.9299	69.7868	70.6438	71.5007
Philippines	176.286	181.1	185.914	190.729	195.543	200.357	205.046	209.734	214.423	219.111	223.8	228.489	233.177	237.866	242.555	247.243
Qatar	96.0865	98.6328	101.179	103.726	106.272	108.818	110.815	112.811	114.808	116.804	118.801	120.797	122.794	124.791	126.787	128.784
Rep. Congo	3.26069	3.41335	3.56602	3.71869	3.87135	4.02402	4.362	4.69998	5.03796	5.37594	5.71392	6.0519	6.38988	6.72786	7.06584	7.40382
Saudi Arabia	573.914	588.24	602.565	616.891	631.216	645.542	659.221	672.899	686.578	700.256	713.935	727.614	741.292	754.971	768.65	782.328
Senegal	8.23193	8.59826	8.9646	9.33094	9.69727	10.0636	10.8589	11.6543	12.4496	13.2449	14.0402	14.8356	15.6309	16.4262	17.2216	18.0169
South Sudan	1.5721	1.64571	1.71932	1.79292	1.86653	1.94014	2.10309	2.26604	2.429	2.59195	2.7549	2.91786	3.08081	3.24376	3.40672	3.56967
Sri Lanka	23.9719	24.4133	24.8547	25.2961	25.7376	26.179	26.8535	27.528	28.2026	28.8771	29.5517	30.2262	30.9007	31.5753	32.2498	32.9243
Sudan	8.8172	9.0021	9.187	9.3719	9.5568	9.7417	9.97033	10.199	10.4276	10.6562	10.8849	11.1135	11.3422	11.5708	11.7994	12.0281
Sum of emerging emitters	4809.09	4920.16	5031.22	5142.28	5253.35	5364.41	5515.36	5666.32	5817.27	5968.2	6119.13	6270.06	6421	6571.93	6722.86	6873.79
Tajikistan	7.23098	7.40528	7.57957	7.75387	7.92816	8.10246	8.19666	8.29087	8.38507	8.47928	8.57348	8.66768	8.76189	8.85609	8.9503	9.0445
Tanzania	13.5339	14.1676	14.8012	15.4349	16.0686	16.7022	18.1051	19.5079	20.9107	22.3136	23.7164	25.1192	26.5221	27.9249	29.3277	30.7306
Turkey	506.668	516.106	525.544	534.982	544.42	553.858	571.108	588.357	605.606	622.855	640.104	657.354	674.603	691.852	709.101	726.35
Turkmenistan	93.6328	95.8897	98.1466	100.404	102.66	104.917	106.137	107.357	108.577	109.797	111.017	112.236	113.456	114.676	115.896	117.116
Uganda	7.08634	7.41812	7.74991	8.08169	8.41348	8.74526	9.47979	10.2143	10.9488	11.6833	12.4179	13.1524	13.8869	14.6214	15.356	16.0905
United Arab Emirates	208.809	214.71	220.61	226.511	232.411	238.312	242.889	247.466	252.042	256.619	261.196	265.773	270.35	274.926	279.503	284.08
Viet Nam	359.809	369.653	379.496	389.34	399.184	409.027	416.355	423.683	431.011	438.339	445.666	452.994	460.322	467.65	474.978	482.306
Zambia	8.81966	9.2326	9.64554	10.0585	10.4714	10.8844	11.7985	12.7127	13.6269	14.5411	15.4553	16.3695	17.2837	18.1978	19.112	20.0262

## Sheet: NoC_LC_2025-2040
Country	2025	2026	2027	2028	2029	2030	2031	2032	2033	2034	2035	2036	2037	2038	2039	2040
Algeria	140.058	142.071	144.085	146.098	148.112	150.125	151.391	152.656	153.921	155.186	156.452	157.717	158.982	160.247	161.513	162.778
Angola	18.9683	19.839	20.7096	21.5803	22.4509	23.3215	24.7834	26.2453	27.7072	29.1691	30.631	32.0929	33.5548	35.0167	36.4786	37.9405
Armenia	6.51161	6.47513	6.43865	6.40216	6.36568	6.3292	6.30417	6.27915	6.25412	6.2291	6.20407	6.17905	6.15402	6.129	6.10397	6.07895
Azerbaijan	30.4667	30.2874	30.1081	29.9288	29.7495	29.5702	29.5436	29.5171	29.4905	29.464	29.4374	29.4109	29.3843	29.3577	29.3312	29.3046
Bangladesh	133.444	137.888	142.331	146.774	151.217	155.66	160.674	165.688	170.702	175.715	180.729	185.743	190.757	195.771	200.785	205.799
Benin	8.44069	8.82812	9.21555	9.60298	9.99041	10.3778	11.0284	11.6789	12.3294	12.9737	13.6149	14.2561	14.8973	15.5385	16.1797	16.8209
Bolivia	28.2522	28.6539	29.0557	29.4574	29.8591	30.2608	30.4171	30.5733	30.7295	30.8858	31.042	31.1982	31.3545	31.5107	31.667	31.8232
Botswana	9.49453	9.90015	10.3058	10.7114	11.117	11.5226	12.0432	12.5638	13.0844	13.605	14.1256	14.6462	15.1668	15.6874	16.208	16.7286
Cambodia	15.4399	15.3703	15.3008	15.2313	15.1617	15.0922	15.2239	15.3556	15.4873	15.6191	15.7508	15.8825	16.0142	16.146	16.2777	16.4094
Cameroon	7.09662	7.37945	7.66228	7.94511	8.22795	8.51078	8.96388	9.41698	9.87007	10.3232	10.7763	11.2294	11.6825	12.1356	12.5887	13.0418
Chile	95.5989	96.2293	96.8596	97.49	98.1204	98.7508	99.2467	99.7426	100.238	100.734	101.23	101.726	102.222	102.718	103.214	103.71
Colombia	89.4708	91.9316	94.3924	96.8533	99.3141	101.775	105.028	108.281	111.533	114.786	118.039	121.292	124.545	127.798	131.05	134.303
Cote d'Ivoire	12.556	13.031	13.506	13.981	14.4561	14.9311	15.68	16.4289	17.1778	17.9267	18.6756	19.4245	20.1734	20.9223	21.6712	22.4201
Dem. Rep. Congo	2.58863	2.71164	2.83466	2.95767	3.08068	3.2037	3.40317	3.60264	3.80212	4.00159	4.20107	4.40054	4.60002	4.79949	4.99897	5.19844
Egypt	262.614	265.714	268.814	271.914	275.014	278.114	279.2	280.286	281.372	282.458	283.544	284.63	285.716	286.802	287.888	288.974
Eritrea	1.00538	1.05164	1.09791	1.14417	1.19043	1.2367	1.31223	1.38777	1.4633	1.53883	1.61437	1.6899	1.76544	1.84097	1.91651	1.99204
Ethiopia	19.4996	20.3536	21.2076	22.0616	22.9156	23.7696	25.1304	26.4912	27.8521	29.2129	30.5737	31.9345	33.2953	34.6562	36.017	37.3778
Georgia	11.3385	11.0604	10.7822	10.5041	10.226	9.94788	9.96468	9.98149	9.9983	10.0151	10.0319	10.0487	10.0655	10.0823	10.0991	10.1159
Ghana	18.5379	19.332	20.1261	20.9202	21.7143	22.5083	23.8112	25.1141	26.4169	27.7198	29.0226	30.3255	31.6283	32.9312	34.2341	35.5369
Guatemala	18.1396	18.5356	18.9315	19.3274	19.7234	20.1193	20.2261	20.3329	20.4396	20.5464	20.6532	20.76	20.8667	20.9735	21.0803	21.1871
Haiti	3.22498	3.24083	3.25667	3.27251	3.28835	3.30419	3.3127	3.32121	3.32972	3.33824	3.34675	3.35526	3.36377	3.37228	3.38079	3.3893
Honduras	9.6316	9.82316	10.0147	10.2063	10.3978	10.5894	10.6269	10.6645	10.7021	10.7396	10.7772	10.8147	10.8523	10.8898	10.9274	10.9649
Indonesia	721.883	735.065	748.248	761.43	774.612	787.794	796.566	805.339	814.111	822.883	831.655	840.427	849.199	857.971	866.743	875.515
Iraq	179.982	185.17	190.359	195.547	200.736	205.924	207.946	209.967	211.989	214.01	216.032	218.053	220.075	222.096	224.118	226.139
Jordan	23.0547	23.7237	24.3927	25.0617	25.7307	26.3997	26.6438	26.888	27.1321	27.3762	27.6203	27.8645	28.1086	28.3527	28.5968	28.841
Kenya	19.7491	20.6556	21.5621	22.4686	23.3751	24.2816	25.8036	27.3257	28.8478	30.3699	31.8919	33.414	34.9361	36.4581	37.9802	39.5023
Kyrgyzstan	12.8083	13.078	13.3476	13.6172	13.8869	14.1565	14.3027	14.449	14.5952	14.7414	14.8876	15.0339	15.1801	15.3263	15.4725	15.6187
Lao People's Dem. Rep.	21.7604	21.6624	21.5644	21.4664	21.3684	21.2704	21.456	21.6417	21.8273	22.013	22.1986	22.3842	22.5699	22.7555	22.9412	23.1268
Lebanon	32.0596	32.5023	32.9451	33.3878	33.8306	34.2734	34.1116	33.9498	33.7881	33.6263	33.4645	33.3028	33.141	32.9792	32.8175	32.6557
Mali	5.65023	5.92534	6.20046	6.47558	6.75069	7.02581	7.48246	7.9391	8.39575	8.8524	9.30905	9.76569	10.2223	10.679	11.1356	11.5923
Mongolia	31.18	31.8416	32.5032	33.1648	33.8264	34.4881	34.1785	33.8689	33.5593	33.2497	32.9401	32.6305	32.321	32.0114	31.7018	31.3922
Morocco	63.2529	63.8881	64.5232	65.1584	65.7935	66.4287	66.5211	66.6136	66.7061	66.7986	66.8911	66.9836	67.0761	67.1686	67.261	67.3535
Mozambique	6.64989	6.92885	7.2078	7.48676	7.76571	8.04467	8.49176	8.93885	9.38594	9.83303	10.2801	10.7272	11.1743	11.6214	12.0685	12.5156
Myanmar	52.8374	55.5335	58.2264	60.9164	63.6035	66.2879	68.5623	70.8002	73.0033	75.1731	77.3112	79.419	81.4979	83.549	85.5736	87.5729
Namibia	4.8673	5.04803	5.22876	5.40949	5.59022	5.77096	6.03471	6.30086	6.57474	6.84863	7.12251	7.3964	7.67029	7.94417	8.21806	8.49194
Nepal	19.7555	20.1883	20.6211	21.0539	21.4868	21.9196	22.6805	23.4414	24.2023	24.9632	25.7241	26.485	27.2459	28.0068	28.7677	29.5286
Nicaragua	5.05614	5.14249	5.22884	5.31519	5.40154	5.48789	5.50987	5.53184	5.53907	5.53919	5.53931	5.53943	5.53955	5.53968	5.5398	5.53992
Niger	2.59329	2.73782	2.88235	3.02688	3.1714	3.31593	3.58759	3.85924	4.1309	4.40255	4.6742	4.94586	5.21751	5.48917	5.76082	6.03247
Nigeria	130.034	136.237	142.44	148.644	154.847	161.05	172.004	182.958	193.911	204.865	215.819	226.773	237.727	248.681	259.634	270.588
Oman	73.1387	74.9472	76.7558	78.5644	80.3729	82.1815	82.7239	83.2663	83.8088	84.3512	84.8936	85.4361	85.9785	86.5209	87.0633	87.6058
Pakistan	304.236	309.925	315.615	321.305	326.995	332.685	340.309	347.934	355.559	363.183	370.808	378.433	386.057	393.682	401.306	408.931
Paraguay	10.6341	10.9427	11.2514	11.5601	11.8688	12.1774	12.2963	12.4151	12.5339	12.6528	12.7716	12.8905	13.0093	13.1281	13.247	13.3658
Peru	58.2858	59.1146	59.9434	60.7722	61.6009	62.4297	62.752	63.0744	63.3967	63.719	64.0413	64.3637	64.686	65.0083	65.3306	65.653
Philippines	176.203	180.934	185.665	190.397	195.128	199.859	202.795	205.731	208.667	211.603	214.539	217.475	220.411	223.347	226.283	229.219
Qatar	95.9867	98.4334	100.88	103.327	105.773	108.22	108.956	109.691	110.427	111.163	111.899	112.634	113.37	114.106	114.842	115.577
Rep. Congo	3.25754	3.40706	3.55659	3.70611	3.85563	4.00515	4.25621	4.50727	4.75833	5.00939	5.26045	5.51151	5.76257	6.01363	6.26469	6.51575
Saudi Arabia	573.334	587.08	600.826	614.571	628.317	642.062	647.507	652.952	658.397	663.842	669.286	674.731	680.176	685.621	691.066	696.51
Senegal	8.22396	8.58234	8.94071	9.29908	9.65745	10.0158	10.5997	11.1836	11.7675	12.3514	12.9353	13.5192	14.1031	14.687	15.2709	15.8549
South Sudan	1.57059	1.64268	1.71477	1.78686	1.85895	1.93104	2.05208	2.17313	2.29418	2.41522	2.53627	2.65731	2.77836	2.8994	3.02045	3.1415
Sri Lanka	23.9719	24.4133	24.8547	25.2961	25.7376	26.179	26.8535	27.528	28.2026	28.8771	29.5517	30.2262	30.9007	31.5753	32.2498	32.9243
Sudan	8.81313	8.99397	9.1748	9.35564	9.53648	9.71731	9.85789	9.99846	10.139	10.2796	10.4202	10.5608	10.7013	10.8419	10.9825	11.1231
Sum of emerging emitters	4803.64	4909.25	5014.86	5120.47	5226.08	5331.69	5412.78	5493.87	5574.95	5656.02	5737.09	5818.15	5899.22	5980.29	6061.35	6142.42
Tajikistan	7.22719	7.39768	7.56818	7.73868	7.90918	8.07968	8.08872	8.09776	8.10681	8.11585	8.12489	8.13393	8.14297	8.15201	8.16105	8.17009
Tanzania	13.5209	14.1415	14.7621	15.3827	16.0033	16.6239	17.666	18.708	19.7501	20.7921	21.8342	22.8763	23.9183	24.9604	26.0024	27.0445
Turkey	506.238	515.246	524.253	533.261	542.269	551.276	563.892	576.507	589.123	601.739	614.354	626.97	639.585	652.201	664.816	677.432
Turkmenistan	93.5836	95.7914	97.9992	100.207	102.415	104.622	104.74	104.857	104.974	105.091	105.208	105.325	105.442	105.559	105.676	105.793
Uganda	7.0795	7.40445	7.72941	8.05436	8.37931	8.70426	9.24988	9.79549	10.3411	10.8867	11.4324	11.978	12.5236	13.0692	13.6148	14.1604
United Arab Emirates	208.571	214.233	219.895	225.557	231.22	236.882	238.397	239.913	241.428	242.943	244.459	245.974	247.489	249.005	250.52	252.036
Viet Nam	359.225	368.484	377.743	387.002	396.261	405.52	406.351	407.183	408.014	408.846	409.677	410.509	411.34	412.172	413.003	413.835
Zambia	8.81116	9.21559	9.62002	10.0245	10.4289	10.8333	11.5124	12.1915	12.8706	13.5496	14.2287	14.9078	15.5869	16.2659	16.945	17.6241

## Sheet: NoC_eLC_2025-2040
Country	2025	2026	2027	2028	2029	2030	2031	2032	2033	2034	2035	2036	2037	2038	2039	2040
Algeria	139.632	141.22	142.808	144.395	145.983	147.571	148.396	149.221	150.046	150.871	151.696	152.521	153.346	154.171	154.996	155.821
Angola	18.8446	19.5916	20.3386	21.0855	21.8325	22.5795	23.8714	25.1633	26.4552	27.7471	29.039	30.3309	31.6229	32.9148	34.2067	35.4986
Armenia	6.51161	6.47513	6.43865	6.40216	6.36568	6.3292	6.3041	6.279	6.2539	6.2288	6.2037	6.17859	6.15349	6.12839	6.10329	6.07819
Azerbaijan	30.429	30.212	29.9951	29.7781	29.5611	29.3441	29.2535	29.1628	29.0721	28.9814	28.8908	28.8001	28.7094	28.6187	28.5281	28.4374
Bangladesh	129.288	129.574	129.861	130.147	130.433	130.72	132.898	135.076	137.253	139.431	141.609	143.787	145.965	148.143	150.321	152.499
Benin	8.38565	8.71805	9.05044	9.38283	9.71522	10.0476	10.6225	11.1974	11.7723	12.3432	12.9093	13.4755	14.0416	14.6077	15.1738	15.7399
Bolivia	27.976	28.1015	28.227	28.3525	28.478	28.6035	28.706	28.8085	28.9109	29.0134	29.1158	29.2183	29.3208	29.4232	29.5257	29.6281
Botswana	9.43776	9.78662	10.1355	10.4843	10.8332	11.182	11.6049	12.0278	12.4507	12.8736	13.2964	13.7193	14.1422	14.5651	14.988	15.4109
Cambodia	15.4076	15.3059	15.2041	15.1023	15.0006	14.8988	14.9305	14.9622	14.9939	15.0255	15.0572	15.0889	15.1206	15.1523	15.184	15.2156
Cameroon	7.05005	7.28632	7.52259	7.75887	7.99514	8.23141	8.62724	9.02307	9.4189	9.81473	10.2106	10.6064	11.0022	11.3981	11.7939	12.1897
Chile	95.4429	95.9173	96.3917	96.866	97.3404	97.8148	98.2537	98.6926	99.1316	99.5705	100.009	100.448	100.887	101.326	101.765	102.204
Colombia	88.7993	90.5886	92.378	94.1673	95.9566	97.746	101.011	104.276	107.541	110.806	114.071	117.336	120.601	123.866	127.131	130.396
Cote d'Ivoire	12.4734	12.866	13.2585	13.651	14.0435	14.436	15.0872	15.7384	16.3896	17.0408	17.692	18.3433	18.9945	19.6457	20.2969	20.9481
Dem. Rep. Congo	2.57179	2.67796	2.78412	2.89029	2.99646	3.10263	3.27889	3.45515	3.63141	3.80767	3.98393	4.16019	4.33645	4.51271	4.68898	4.86524
Egypt	259.764	260.014	260.264	260.514	260.765	261.015	260.05	259.086	258.121	257.156	256.192	255.227	254.262	253.298	252.333	251.368
Eritrea	0.999393	1.03967	1.07994	1.12022	1.16049	1.20077	1.2643	1.32783	1.39136	1.45489	1.51842	1.58196	1.64549	1.70902	1.77255	1.83608
Ethiopia	19.3722	20.0987	20.8253	21.5518	22.2784	23.0049	24.2004	25.3958	26.5913	27.7867	28.9822	30.1776	31.3731	32.5685	33.764	34.9594
Georgia	11.3385	11.0604	10.7822	10.5041	10.226	9.94788	9.9373	9.92672	9.91615	9.90557	9.89499	9.88442	9.87384	9.86326	9.85269	9.84211
Ghana	18.4166	19.0894	19.7622	20.435	21.1078	21.7806	22.9258	24.0709	25.2161	26.3612	27.5064	28.6515	29.7967	30.9419	32.087	33.2322
Guatemala	17.9105	18.0773	18.2441	18.411	18.5778	18.7446	18.8058	18.867	18.9282	18.9894	19.0506	19.1118	19.173	19.2342	19.2954	19.3566
Haiti	3.19561	3.18208	3.16855	3.15502	3.14149	3.12796	3.13227	3.13658	3.14089	3.14519	3.1495	3.15381	3.15812	3.16243	3.16673	3.17104
Honduras	9.51001	9.57998	9.64995	9.71993	9.7899	9.85987	9.87503	9.8902	9.90536	9.92053	9.93569	9.95086	9.96602	9.98119	9.99635	10.0115
Indonesia	717.824	726.948	736.071	745.195	754.318	763.442	769.806	776.17	782.535	788.899	795.263	801.628	807.992	814.357	820.721	827.085
Iraq	178.831	182.868	186.906	190.943	194.98	199.018	199.753	200.489	201.225	201.96	202.696	203.432	204.168	204.903	205.639	206.375
Jordan	22.9073	23.4288	23.9504	24.472	24.9935	25.5151	25.5957	25.6763	25.7569	25.8375	25.9181	25.9987	26.0793	26.1599	26.2405	26.3211
Kenya	19.6204	20.3981	21.1758	21.9535	22.7312	23.5089	24.854	26.1991	27.5442	28.8893	30.2344	31.5795	32.9246	34.2697	35.6148	36.9599
Kyrgyzstan	12.7987	13.0588	13.3189	13.5789	13.839	14.099	14.2538	14.4085	14.5633	14.718	14.8728	15.0275	15.1823	15.337	15.4918	15.6465
Lao People's Dem. Rep.	21.715	21.5715	21.4281	21.2847	21.1413	20.9979	21.0425	21.0872	21.1318	21.1765	21.2211	21.2658	21.3104	21.3551	21.3997	21.4444
Lebanon	31.8548	32.0929	32.3309	32.5689	32.807	33.045	32.7136	32.3821	32.0507	31.7193	31.3878	31.0564	30.7249	30.3935	30.0621	29.7306
Mali	5.61352	5.85192	6.09033	6.32874	6.56714	6.80555	7.21014	7.61473	8.01932	8.42391	8.8285	9.23309	9.63768	10.0423	10.4469	10.8515
Mongolia	30.6865	30.8546	31.0227	31.1908	31.3589	31.5271	31.5082	31.4894	31.4706	31.4518	31.433	31.4142	31.3954	31.3766	31.3578	31.3389
Morocco	63.061	63.5043	63.9475	64.3908	64.834	65.2773	65.195	65.1127	65.0304	64.9481	64.8658	64.7835	64.7013	64.619	64.5367	64.4544
Mozambique	6.60634	6.84175	7.07716	7.31257	7.54798	7.78339	8.17526	8.56713	8.959	9.35087	9.74274	10.1346	10.5265	10.9183	11.3102	11.7021
Myanmar	52.5758	54.9892	57.3791	59.7464	62.0917	64.4157	66.3902	68.3168	70.1977	72.035	73.8308	75.5868	77.3049	78.9867	80.6337	82.2474
Namibia	4.8353	4.98402	5.13275	5.28148	5.43021	5.57893	5.80659	6.03542	6.27257	6.50973	6.74689	6.98404	7.2212	7.45835	7.69551	7.93267
Nepal	19.7555	20.1883	20.6211	21.0539	21.4868	21.9196	22.6805	23.4414	24.2023	24.9632	25.7241	26.485	27.2459	28.0068	28.7677	29.5286
Nicaragua	4.99239	5.01498	5.03757	5.06017	5.08276	5.10535	5.1155	5.12565	5.12559	5.11571	5.10582	5.09593	5.08604	5.07616	5.06627	5.05638
Niger	2.57663	2.70449	2.83236	2.96022	3.08809	3.21595	3.45975	3.70355	3.94735	4.19115	4.43495	4.67875	4.92255	5.16635	5.41015	5.65395
Nigeria	129.188	134.545	139.902	145.26	150.617	155.974	165.702	175.43	185.158	194.885	204.613	214.341	224.069	233.797	243.524	253.252
Oman	72.6265	73.9228	75.2192	76.5156	77.8119	79.1083	79.3132	79.5182	79.7232	79.9281	80.1331	80.338	80.543	80.748	80.9529	81.1579
Pakistan	299.998	301.451	302.903	304.355	305.808	307.26	314.592	321.923	329.255	336.586	343.918	351.249	358.581	365.912	373.244	380.575
Paraguay	10.4876	10.6498	10.8121	10.9743	11.1365	11.2987	11.3823	11.466	11.5496	11.6332	11.7168	11.8004	11.884	11.9676	12.0512	12.1348
Peru	57.716	57.9749	58.2339	58.4928	58.7517	59.0107	59.222	59.4334	59.6448	59.8562	60.0676	60.2789	60.4903	60.7017	60.9131	61.1244
Philippines	175.748	180.024	184.3	188.575	192.851	197.127	199.251	201.376	203.5	205.624	207.748	209.872	211.996	214.121	216.245	218.369
Qatar	95.3146	97.089	98.8635	100.638	102.412	104.187	104.477	104.767	105.056	105.346	105.636	105.926	106.216	106.505	106.795	107.085
Rep. Congo	3.2363	3.36458	3.49287	3.62115	3.74943	3.87771	4.09958	4.32145	4.54331	4.76518	4.98705	5.20892	5.43079	5.65266	5.87452	6.09639
Saudi Arabia	570.102	580.616	591.13	601.643	612.157	622.671	624.272	625.874	627.476	629.077	630.679	632.28	633.882	635.484	637.085	638.687
Senegal	8.1702	8.47481	8.77941	9.08402	9.38863	9.69323	10.2068	10.7203	11.2338	11.7473	12.2609	12.7744	13.2879	13.8014	14.3149	14.8285
South Sudan	1.56035	1.6222	1.68405	1.7459	1.80774	1.86959	1.97657	2.08354	2.19051	2.29748	2.40445	2.51142	2.61839	2.72536	2.83234	2.93931
Sri Lanka	23.9719	24.4133	24.8547	25.2961	25.7376	26.179	26.8535	27.528	28.2026	28.8771	29.5517	30.2262	30.9007	31.5753	32.2498	32.9243
Sudan	8.78631	8.94031	9.09432	9.24833	9.40234	9.55635	9.66597	9.7756	9.88522	9.99485	10.1045	10.2141	10.3237	10.4334	10.543	10.6526
Sum of emerging emitters	4767.64	4837.24	4906.85	4976.46	5046.07	5115.67	5172.88	5230.1	5287.31	5344.5	5401.69	5458.88	5516.07	5573.27	5630.46	5687.65
Tajikistan	7.20206	7.34744	7.49281	7.63819	7.78356	7.92894	7.90228	7.87562	7.84896	7.8223	7.79564	7.76898	7.74232	7.71566	7.689	7.66234
Tanzania	13.4327	13.9652	14.4976	15.0301	15.5625	16.0949	17.0158	17.9367	18.8576	19.7785	20.6994	21.6203	22.5412	23.4621	24.383	25.3039
Turkey	503.36	509.49	515.62	521.749	527.879	534.009	545.279	556.549	567.819	579.089	590.359	601.629	612.899	624.17	635.44	646.71
Turkmenistan	93.2583	95.1407	97.0232	98.9056	100.788	102.67	102.325	101.98	101.635	101.29	100.944	100.599	100.254	99.9088	99.5635	99.2183
Uganda	7.03334	7.31213	7.59092	7.86971	8.1485	8.42729	8.90947	9.39165	9.87382	10.356	10.8382	11.3204	11.8025	12.2847	12.7669	13.2491
United Arab Emirates	207.236	211.564	215.892	220.22	224.547	228.875	228.982	229.089	229.196	229.303	229.41	229.517	229.624	229.731	229.838	229.945
Viet Nam	355.2	360.434	365.668	370.902	376.136	381.37	380.185	379.001	377.816	376.632	375.447	374.262	373.078	371.893	370.709	369.524
Zambia	8.7537	9.10068	9.44767	9.79465	10.1416	10.4886	11.0887	11.6888	12.289	12.8891	13.4892	14.0893	14.6894	15.2896	15.8897	16.4898

## Sheet: Mild_NP_2025-2040
Country	2025	2026	2027	2028	2029	2030	2031	2032	2033	2034	2035	2036	2037	2038	2039	2040
Algeria	140.122	142.201	144.279	146.357	148.435	150.513	153.065	155.617	158.169	160.721	163.274	165.826	168.378	170.93	173.482	176.034
Angola	18.9866	19.8756	20.7645	21.6535	22.5425	23.4314	25.3994	27.3675	29.3355	31.3035	33.2715	35.2396	37.2076	39.1756	41.1436	43.1116
Armenia	6.51161	6.47513	6.43865	6.40216	6.36568	6.3292	6.30432	6.27945	6.25458	6.2297	6.20483	6.17995	6.15508	6.1302	6.10533	6.08045
Azerbaijan	30.4725	30.2989	30.1254	29.9519	29.7783	29.6048	29.7315	29.8583	29.985	30.1117	30.2385	30.3652	30.492	30.6187	30.7454	30.8722
Bangladesh	133.99	138.978	143.967	148.955	153.944	158.932	171.888	184.843	197.798	210.753	223.708	236.663	249.618	262.573	275.528	288.483
Benin	8.44884	8.84442	9.23999	9.63557	10.0312	10.4267	11.3025	12.1782	13.054	13.92	14.7856	15.6511	16.5167	17.3822	18.2477	19.1133
Bolivia	28.2927	28.735	29.1772	29.6195	30.0617	30.504	30.9194	31.3347	31.7501	32.1655	32.5808	32.9962	33.4116	33.827	34.2423	34.6577
Botswana	9.50466	9.92041	10.3362	10.7519	11.1677	11.5834	12.3517	13.1201	13.8884	14.6568	15.4251	16.1934	16.9618	17.7301	18.4984	19.2668
Cambodia	15.4448	15.3801	15.3155	15.2509	15.1863	15.1217	15.468	15.8144	16.1608	16.5072	16.8535	17.1999	17.5463	17.8927	18.239	18.5854
Cameroon	7.10352	7.39325	7.68299	7.97272	8.26246	8.55219	9.17913	9.80607	10.433	11.06	11.6869	12.3138	12.9408	13.5677	14.1947	14.8216
Chile	95.6227	96.2769	96.9311	97.5853	98.2395	98.8937	99.6571	100.42	101.184	101.947	102.711	103.474	104.238	105.001	105.764	106.528
Colombia	89.5701	92.1302	94.6904	97.2505	99.8107	102.371	106.137	109.903	113.67	117.436	121.202	124.968	128.735	132.501	136.267	140.033
Cote d'Ivoire	12.5682	13.0555	13.5427	14.03	14.5172	15.0045	16.0522	17.0998	18.1475	19.1951	20.2428	21.2905	22.3381	23.3858	24.4334	25.4811
Dem. Rep. Congo	2.59113	2.71663	2.84214	2.96764	3.09315	3.21865	3.48746	3.75627	4.02508	4.29388	4.56269	4.8315	5.10031	5.36911	5.63792	5.90673
Egypt	263.03	266.546	270.063	273.579	277.095	280.612	287.261	293.909	300.558	307.207	313.855	320.504	327.153	333.801	340.45	347.099
Eritrea	1.00645	1.05378	1.10111	1.14844	1.19577	1.24311	1.3482	1.4533	1.5584	1.6635	1.76859	1.87369	1.97879	2.08388	2.18898	2.29408
Ethiopia	19.5185	20.3914	21.2643	22.1371	23.01	23.8829	25.7421	27.6012	29.4604	31.3195	33.1787	35.0379	36.897	38.7562	40.6154	42.4745
Georgia	11.3385	11.0604	10.7822	10.5041	10.226	9.94788	10.0223	10.0968	10.1712	10.2457	10.3201	10.3946	10.469	10.5435	10.618	10.6924
Ghana	18.5559	19.3679	20.18	20.992	21.8041	22.6162	24.3929	26.1697	27.9464	29.7232	31.4999	33.2767	35.0534	36.8301	38.6069	40.3836
Guatemala	18.1727	18.6017	19.0307	19.4598	19.8888	20.3178	20.6126	20.9074	21.2022	21.497	21.7918	22.0866	22.3813	22.6761	22.9709	23.2657
Haiti	3.22932	3.24949	3.26966	3.28984	3.31001	3.33018	3.35905	3.38792	3.41679	3.44566	3.47453	3.5034	3.53226	3.56113	3.59	3.61887
Honduras	9.64917	9.8583	10.0674	10.2766	10.4857	10.6948	10.8295	10.9642	11.0989	11.2336	11.3683	11.503	11.6377	11.7723	11.907	12.0417
Indonesia	722.49	736.279	750.069	763.858	777.648	791.437	808.79	826.142	843.495	860.848	878.2	895.553	912.906	930.258	947.611	964.964
Iraq	180.188	185.582	190.975	196.369	201.763	207.157	211.929	216.702	221.474	226.246	231.018	235.79	240.562	245.335	250.107	254.879
Jordan	23.0811	23.7764	24.4717	25.167	25.8623	26.5576	27.1525	27.7473	28.3422	28.937	29.5319	30.1267	30.7216	31.3164	31.9113	32.5061
Kenya	19.7682	20.6938	21.6193	22.5449	23.4704	24.396	26.445	28.494	30.5431	32.5921	34.6412	36.6902	38.7392	40.7883	42.8373	44.8863
Kyrgyzstan	12.8098	13.0809	13.352	13.6231	13.8942	14.1653	14.3129	14.4605	14.6081	14.7557	14.9033	15.0509	15.1986	15.3462	15.4938	15.6414
Lao People's Dem. Rep.	21.7673	21.6762	21.5851	21.4941	21.403	21.3119	21.8001	22.2883	22.7764	23.2646	23.7528	24.2409	24.7291	25.2173	25.7054	26.1936
Lebanon	32.0962	32.5756	33.0551	33.5345	34.0139	34.4933	34.7261	34.959	35.1918	35.4246	35.6574	35.8903	36.1231	36.3559	36.5887	36.8216
Mali	5.65566	5.93621	6.21676	6.49731	6.77785	7.0584	7.6697	8.28099	8.89228	9.50357	10.1149	10.7262	11.3375	11.9487	12.56	13.1713
Mongolia	31.2642	32.01	32.7557	33.5015	34.2473	34.9931	34.6012	34.2093	33.8174	33.4256	33.0337	32.6418	32.2499	31.858	31.4662	31.0743
Morocco	63.282	63.9463	64.6105	65.2747	65.939	66.6032	67.2271	67.851	68.475	69.0989	69.7228	70.3467	70.9706	71.5945	72.2184	72.8424
Mozambique	6.65634	6.94175	7.22716	7.51257	7.79798	8.08339	8.69733	9.31128	9.92522	10.5392	11.1531	11.7671	12.381	12.9949	13.6089	14.2228
Myanmar	52.8767	55.6152	58.3537	61.0922	63.8307	66.5692	69.551	72.5328	75.5146	78.4964	81.4782	84.4601	87.4419	90.4237	93.4055	96.3873
Namibia	4.87205	5.05752	5.243	5.42848	5.61396	5.79944	6.17516	6.55558	6.94259	7.3296	7.71661	8.10362	8.49063	8.87764	9.26465	9.65166
Nepal	19.7555	20.1883	20.6211	21.0539	21.4868	21.9196	22.6874	23.4553	24.2232	24.9911	25.759	26.5269	27.2947	28.0626	28.8305	29.5984
Nicaragua	5.06537	5.16094	5.25651	5.35208	5.44765	5.54322	5.6158	5.68837	5.74118	5.79019	5.83921	5.88823	5.93724	5.98626	6.03527	6.08429
Niger	2.59575	2.74275	2.88974	3.03673	3.18372	3.33071	3.68293	4.03515	4.38738	4.7396	5.09182	5.44404	5.79627	6.14849	6.50071	6.85294
Nigeria	130.159	136.488	142.816	149.144	155.473	161.801	176.367	190.932	205.497	220.062	234.628	249.193	263.758	278.324	292.889	307.454
Oman	73.2147	75.0992	76.9838	78.8684	80.7529	82.6375	84.1355	85.6335	87.1316	88.6296	90.1276	91.6257	93.1237	94.6217	96.1197	97.6178
Pakistan	304.844	311.143	317.441	323.74	330.039	336.337	347.302	358.267	369.231	380.196	391.161	402.126	413.09	424.055	435.02	445.984
Paraguay	10.655	10.9847	11.3143	11.644	11.9736	12.3033	12.5723	12.8413	13.1104	13.3794	13.6484	13.9175	14.1865	14.4555	14.7246	14.9936
Peru	58.3694	59.2818	60.1942	61.1066	62.019	62.9314	63.7883	64.6452	65.5022	66.3591	67.216	68.073	68.9299	69.7868	70.6438	71.5007
Philippines	176.286	181.1	185.914	190.729	195.543	200.357	205.046	209.734	214.423	219.111	223.8	228.489	233.177	237.866	242.555	247.243
Qatar	96.0865	98.6328	101.179	103.726	106.272	108.818	110.815	112.811	114.808	116.804	118.801	120.797	122.794	124.791	126.787	128.784
Rep. Congo	3.26069	3.41335	3.56602	3.71869	3.87135	4.02402	4.362	4.69998	5.03796	5.37594	5.71392	6.0519	6.38988	6.72786	7.06584	7.40382
Saudi Arabia	573.914	588.24	602.565	616.891	631.216	645.542	659.221	672.899	686.578	700.256	713.935	727.614	741.292	754.971	768.65	782.328
Senegal	8.23193	8.59826	8.9646	9.33094	9.69727	10.0636	10.8589	11.6543	12.4496	13.2449	14.0402	14.8356	15.6309	16.4262	17.2216	18.0169
South Sudan	1.5721	1.64571	1.71932	1.79292	1.86653	1.94014	2.10309	2.26604	2.429	2.59195	2.7549	2.91786	3.08081	3.24376	3.40672	3.56967
Sri Lanka	23.9719	24.4133	24.8547	25.2961	25.7376	26.179	26.8535	27.528	28.2026	28.8771	29.5517	30.2262	30.9007	31.5753	32.2498	32.9243
Sudan	8.8172	9.0021	9.187	9.3719	9.5568	9.7417	9.97033	10.199	10.4276	10.6562	10.8849	11.1135	11.3422	11.5708	11.7994	12.0281
Sum of emerging emitters	4809.09	4920.16	5031.22	5142.28	5253.35	5364.41	5515.36	5666.32	5817.27	5968.2	6119.13	6270.06	6421	6571.93	6722.86	6873.79
Tajikistan	7.23098	7.40528	7.57957	7.75387	7.92816	8.10246	8.19666	8.29087	8.38507	8.47928	8.57348	8.66768	8.76189	8.85609	8.9503	9.0445
Tanzania	13.5339	14.1676	14.8012	15.4349	16.0686	16.7022	18.1051	19.5079	20.9107	22.3136	23.7164	25.1192	26.5221	27.9249	29.3277	30.7306
Turkey	506.668	516.106	525.544	534.982	544.42	553.858	571.108	588.357	605.606	622.855	640.104	657.354	674.603	691.852	709.101	726.35
Turkmenistan	93.6328	95.8897	98.1466	100.404	102.66	104.917	106.137	107.357	108.577	109.797	111.017	112.236	113.456	114.676	115.896	117.116
Uganda	7.08634	7.41812	7.74991	8.08169	8.41348	8.74526	9.47979	10.2143	10.9488	11.6833	12.4179	13.1524	13.8869	14.6214	15.356	16.0905
United Arab Emirates	208.809	214.71	220.61	226.511	232.411	238.312	242.889	247.466	252.042	256.619	261.196	265.773	270.35	274.926	279.503	284.08
Viet Nam	359.809	369.653	379.496	389.34	399.184	409.027	416.355	423.683	431.011	438.339	445.666	452.994	460.322	467.65	474.978	482.306
Zambia	8.81966	9.2326	9.64554	10.0585	10.4714	10.8844	11.7985	12.7127	13.6269	14.5411	15.4553	16.3695	17.2837	18.1978	19.112	20.0262

## Sheet: Mild_LC_2025-2040
Country	2025	2026	2027	2028	2029	2030	2031	2032	2033	2034	2035	2036	2037	2038	2039	2040
Algeria	140.058	142.071	144.085	146.098	148.112	150.125	151.391	152.656	153.921	155.186	156.452	157.717	158.982	160.247	161.513	162.778
Angola	18.9683	19.839	20.7096	21.5803	22.4509	23.3215	24.7834	26.2453	27.7072	29.1691	30.631	32.0929	33.5548	35.0167	36.4786	37.9405
Armenia	6.51161	6.47513	6.43865	6.40216	6.36568	6.3292	6.30417	6.27915	6.25412	6.2291	6.20407	6.17905	6.15402	6.129	6.10397	6.07895
Azerbaijan	30.4667	30.2874	30.1081	29.9288	29.7495	29.5702	29.5436	29.5171	29.4905	29.464	29.4374	29.4109	29.3843	29.3577	29.3312	29.3046
Bangladesh	133.444	137.888	142.331	146.774	151.217	155.66	160.674	165.688	170.702	175.715	180.729	185.743	190.757	195.771	200.785	205.799
Benin	8.44069	8.82812	9.21555	9.60298	9.99041	10.3778	11.0284	11.6789	12.3294	12.9737	13.6149	14.2561	14.8973	15.5385	16.1797	16.8209
Bolivia	28.2522	28.6539	29.0557	29.4574	29.8591	30.2608	30.4171	30.5733	30.7295	30.8858	31.042	31.1982	31.3545	31.5107	31.667	31.8232
Botswana	9.49453	9.90015	10.3058	10.7114	11.117	11.5226	12.0432	12.5638	13.0844	13.605	14.1256	14.6462	15.1668	15.6874	16.208	16.7286
Cambodia	15.4399	15.3703	15.3008	15.2313	15.1617	15.0922	15.2239	15.3556	15.4873	15.6191	15.7508	15.8825	16.0142	16.146	16.2777	16.4094
Cameroon	7.09662	7.37945	7.66228	7.94511	8.22795	8.51078	8.96388	9.41698	9.87007	10.3232	10.7763	11.2294	11.6825	12.1356	12.5887	13.0418
Chile	95.5989	96.2293	96.8596	97.49	98.1204	98.7508	99.2467	99.7426	100.238	100.734	101.23	101.726	102.222	102.718	103.214	103.71
Colombia	89.4708	91.9316	94.3924	96.8533	99.3141	101.775	105.028	108.281	111.533	114.786	118.039	121.292	124.545	127.798	131.05	134.303
Cote d'Ivoire	12.556	13.031	13.506	13.981	14.4561	14.9311	15.68	16.4289	17.1778	17.9267	18.6756	19.4245	20.1734	20.9223	21.6712	22.4201
Dem. Rep. Congo	2.58863	2.71164	2.83466	2.95767	3.08068	3.2037	3.40317	3.60264	3.80212	4.00159	4.20107	4.40054	4.60002	4.79949	4.99897	5.19844
Egypt	262.614	265.714	268.814	271.914	275.014	278.114	279.2	280.286	281.372	282.458	283.544	284.63	285.716	286.802	287.888	288.974
Eritrea	1.00538	1.05164	1.09791	1.14417	1.19043	1.2367	1.31223	1.38777	1.4633	1.53883	1.61437	1.6899	1.76544	1.84097	1.91651	1.99204
Ethiopia	19.4996	20.3536	21.2076	22.0616	22.9156	23.7696	25.1304	26.4912	27.8521	29.2129	30.5737	31.9345	33.2953	34.6562	36.017	37.3778
Georgia	11.3385	11.0604	10.7822	10.5041	10.226	9.94788	9.96468	9.98149	9.9983	10.0151	10.0319	10.0487	10.0655	10.0823	10.0991	10.1159
Ghana	18.5379	19.332	20.1261	20.9202	21.7143	22.5083	23.8112	25.1141	26.4169	27.7198	29.0226	30.3255	31.6283	32.9312	34.2341	35.5369
Guatemala	18.1396	18.5356	18.9315	19.3274	19.7234	20.1193	20.2261	20.3329	20.4396	20.5464	20.6532	20.76	20.8667	20.9735	21.0803	21.1871
Haiti	3.22498	3.24083	3.25667	3.27251	3.28835	3.30419	3.3127	3.32121	3.32972	3.33824	3.34675	3.35526	3.36377	3.37228	3.38079	3.3893
Honduras	9.6316	9.82316	10.0147	10.2063	10.3978	10.5894	10.6269	10.6645	10.7021	10.7396	10.7772	10.8147	10.8523	10.8898	10.9274	10.9649
Indonesia	721.883	735.065	748.248	761.43	774.612	787.794	796.566	805.339	814.111	822.883	831.655	840.427	849.199	857.971	866.743	875.515
Iraq	179.982	185.17	190.359	195.547	200.736	205.924	207.946	209.967	211.989	214.01	216.032	218.053	220.075	222.096	224.118	226.139
Jordan	23.0547	23.7237	24.3927	25.0617	25.7307	26.3997	26.6438	26.888	27.1321	27.3762	27.6203	27.8645	28.1086	28.3527	28.5968	28.841
Kenya	19.7491	20.6556	21.5621	22.4686	23.3751	24.2816	25.8036	27.3257	28.8478	30.3699	31.8919	33.414	34.9361	36.4581	37.9802	39.5023
Kyrgyzstan	12.8083	13.078	13.3476	13.6172	13.8869	14.1565	14.3027	14.449	14.5952	14.7414	14.8876	15.0339	15.1801	15.3263	15.4725	15.6187
Lao People's Dem. Rep.	21.7604	21.6624	21.5644	21.4664	21.3684	21.2704	21.456	21.6417	21.8273	22.013	22.1986	22.3842	22.5699	22.7555	22.9412	23.1268
Lebanon	32.0596	32.5023	32.9451	33.3878	33.8306	34.2734	34.1116	33.9498	33.7881	33.6263	33.4645	33.3028	33.141	32.9792	32.8175	32.6557
Mali	5.65023	5.92534	6.20046	6.47558	6.75069	7.02581	7.48246	7.9391	8.39575	8.8524	9.30905	9.76569	10.2223	10.679	11.1356	11.5923
Mongolia	31.18	31.8416	32.5032	33.1648	33.8264	34.4881	34.1785	33.8689	33.5593	33.2497	32.9401	32.6305	32.321	32.0114	31.7018	31.3922
Morocco	63.2529	63.8881	64.5232	65.1584	65.7935	66.4287	66.5211	66.6136	66.7061	66.7986	66.8911	66.9836	67.0761	67.1686	67.261	67.3535
Mozambique	6.64989	6.92885	7.2078	7.48676	7.76571	8.04467	8.49176	8.93885	9.38594	9.83303	10.2801	10.7272	11.1743	11.6214	12.0685	12.5156
Myanmar	52.8374	55.5335	58.2264	60.9164	63.6035	66.2879	68.5623	70.8002	73.0033	75.1731	77.3112	79.419	81.4979	83.549	85.5736	87.5729
Namibia	4.8673	5.04803	5.22876	5.40949	5.59022	5.77096	6.03471	6.30086	6.57474	6.84863	7.12251	7.3964	7.67029	7.94417	8.21806	8.49194
Nepal	19.7555	20.1883	20.6211	21.0539	21.4868	21.9196	22.6805	23.4414	24.2023	24.9632	25.7241	26.485	27.2459	28.0068	28.7677	29.5286
Nicaragua	5.05614	5.14249	5.22884	5.31519	5.40154	5.48789	5.50987	5.53184	5.53907	5.53919	5.53931	5.53943	5.53955	5.53968	5.5398	5.53992
Niger	2.59329	2.73782	2.88235	3.02688	3.1714	3.31593	3.58759	3.85924	4.1309	4.40255	4.6742	4.94586	5.21751	5.48917	5.76082	6.03247
Nigeria	130.034	136.237	142.44	148.644	154.847	161.05	172.004	182.958	193.911	204.865	215.819	226.773	237.727	248.681	259.634	270.588
Oman	73.1387	74.9472	76.7558	78.5644	80.3729	82.1815	82.7239	83.2663	83.8088	84.3512	84.8936	85.4361	85.9785	86.5209	87.0633	87.6058
Pakistan	304.236	309.925	315.615	321.305	326.995	332.685	340.309	347.934	355.559	363.183	370.808	378.433	386.057	393.682	401.306	408.931
Paraguay	10.6341	10.9427	11.2514	11.5601	11.8688	12.1774	12.2963	12.4151	12.5339	12.6528	12.7716	12.8905	13.0093	13.1281	13.247	13.3658
Peru	58.2858	59.1146	59.9434	60.7722	61.6009	62.4297	62.752	63.0744	63.3967	63.719	64.0413	64.3637	64.686	65.0083	65.3306	65.653
Philippines	176.203	180.934	185.665	190.397	195.128	199.859	202.795	205.731	208.667	211.603	214.539	217.475	220.411	223.347	226.283	229.219
Qatar	95.9867	98.4334	100.88	103.327	105.773	108.22	108.956	109.691	110.427	111.163	111.899	112.634	113.37	114.106	114.842	115.577
Rep. Congo	3.25754	3.40706	3.55659	3.70611	3.85563	4.00515	4.25621	4.50727	4.75833	5.00939	5.26045	5.51151	5.76257	6.01363	6.26469	6.51575
Saudi Arabia	573.334	587.08	600.826	614.571	628.317	642.062	647.507	652.952	658.397	663.842	669.286	674.731	680.176	685.621	691.066	696.51
Senegal	8.22396	8.58234	8.94071	9.29908	9.65745	10.0158	10.5997	11.1836	11.7675	12.3514	12.9353	13.5192	14.1031	14.687	15.2709	15.8549
South Sudan	1.57059	1.64268	1.71477	1.78686	1.85895	1.93104	2.05208	2.17313	2.29418	2.41522	2.53627	2.65731	2.77836	2.8994	3.02045	3.1415
Sri Lanka	23.9719	24.4133	24.8547	25.2961	25.7376	26.179	26.8535	27.528	28.2026	28.8771	29.5517	30.2262	30.9007	31.5753	32.2498	32.9243
Sudan	8.81313	8.99397	9.1748	9.35564	9.53648	9.71731	9.85789	9.99846	10.139	10.2796	10.4202	10.5608	10.7013	10.8419	10.9825	11.1231
Sum of emerging emitters	4803.64	4909.25	5014.86	5120.47	5226.08	5331.69	5412.78	5493.87	5574.95	5656.02	5737.09	5818.15	5899.22	5980.29	6061.35	6142.42
Tajikistan	7.22719	7.39768	7.56818	7.73868	7.90918	8.07968	8.08872	8.09776	8.10681	8.11585	8.12489	8.13393	8.14297	8.15201	8.16105	8.17009
Tanzania	13.5209	14.1415	14.7621	15.3827	16.0033	16.6239	17.666	18.708	19.7501	20.7921	21.8342	22.8763	23.9183	24.9604	26.0024	27.0445
Turkey	506.238	515.246	524.253	533.261	542.269	551.276	563.892	576.507	589.123	601.739	614.354	626.97	639.585	652.201	664.816	677.432
Turkmenistan	93.5836	95.7914	97.9992	100.207	102.415	104.622	104.74	104.857	104.974	105.091	105.208	105.325	105.442	105.559	105.676	105.793
Uganda	7.0795	7.40445	7.72941	8.05436	8.37931	8.70426	9.24988	9.79549	10.3411	10.8867	11.4324	11.978	12.5236	13.0692	13.6148	14.1604
United Arab Emirates	208.571	214.233	219.895	225.557	231.22	236.882	238.397	239.913	241.428	242.943	244.459	245.974	247.489	249.005	250.52	252.036
Viet Nam	359.225	368.484	377.743	387.002	396.261	405.52	406.351	407.183	408.014	408.846	409.677	410.509	411.34	412.172	413.003	413.835
Zambia	8.81116	9.21559	9.62002	10.0245	10.4289	10.8333	11.5124	12.1915	12.8706	13.5496	14.2287	14.9078	15.5869	16.2659	16.945	17.6241

## Sheet: Mild_eLC_2025-2040
Country	2025	2026	2027	2028	2029	2030	2031	2032	2033	2034	2035	2036	2037	2038	2039	2040
Algeria	139.632	141.22	142.808	144.395	145.983	147.571	148.396	149.221	150.046	150.871	151.696	152.521	153.346	154.171	154.996	155.821
Angola	18.8446	19.5916	20.3386	21.0855	21.8325	22.5795	23.8714	25.1633	26.4552	27.7471	29.039	30.3309	31.6229	32.9148	34.2067	35.4986
Armenia	6.51161	6.47513	6.43865	6.40216	6.36568	6.3292	6.3041	6.279	6.2539	6.2288	6.2037	6.17859	6.15349	6.12839	6.10329	6.07819
Azerbaijan	30.429	30.212	29.9951	29.7781	29.5611	29.3441	29.2535	29.1628	29.0721	28.9814	28.8908	28.8001	28.7094	28.6187	28.5281	28.4374
Bangladesh	129.288	129.574	129.861	130.147	130.433	130.72	132.898	135.076	137.253	139.431	141.609	143.787	145.965	148.143	150.321	152.499
Benin	8.38565	8.71805	9.05044	9.38283	9.71522	10.0476	10.6225	11.1974	11.7723	12.3432	12.9093	13.4755	14.0416	14.6077	15.1738	15.7399
Bolivia	27.976	28.1015	28.227	28.3525	28.478	28.6035	28.706	28.8085	28.9109	29.0134	29.1158	29.2183	29.3208	29.4232	29.5257	29.6281
Botswana	9.43776	9.78662	10.1355	10.4843	10.8332	11.182	11.6049	12.0278	12.4507	12.8736	13.2964	13.7193	14.1422	14.5651	14.988	15.4109
Cambodia	15.4076	15.3059	15.2041	15.1023	15.0006	14.8988	14.9305	14.9622	14.9939	15.0255	15.0572	15.0889	15.1206	15.1523	15.184	15.2156
Cameroon	7.05005	7.28632	7.52259	7.75887	7.99514	8.23141	8.62724	9.02307	9.4189	9.81473	10.2106	10.6064	11.0022	11.3981	11.7939	12.1897
Chile	95.4429	95.9173	96.3917	96.866	97.3404	97.8148	98.2537	98.6926	99.1316	99.5705	100.009	100.448	100.887	101.326	101.765	102.204
Colombia	88.7993	90.5886	92.378	94.1673	95.9566	97.746	101.011	104.276	107.541	110.806	114.071	117.336	120.601	123.866	127.131	130.396
Cote d'Ivoire	12.4734	12.866	13.2585	13.651	14.0435	14.436	15.0872	15.7384	16.3896	17.0408	17.692	18.3433	18.9945	19.6457	20.2969	20.9481
Dem. Rep. Congo	2.57179	2.67796	2.78412	2.89029	2.99646	3.10263	3.27889	3.45515	3.63141	3.80767	3.98393	4.16019	4.33645	4.51271	4.68898	4.86524
Egypt	259.764	260.014	260.264	260.514	260.765	261.015	260.05	259.086	258.121	257.156	256.192	255.227	254.262	253.298	252.333	251.368
Eritrea	0.999393	1.03967	1.07994	1.12022	1.16049	1.20077	1.2643	1.32783	1.39136	1.45489	1.51842	1.58196	1.64549	1.70902	1.77255	1.83608
Ethiopia	19.3722	20.0987	20.8253	21.5518	22.2784	23.0049	24.2004	25.3958	26.5913	27.7867	28.9822	30.1776	31.3731	32.5685	33.764	34.9594
Georgia	11.3385	11.0604	10.7822	10.5041	10.226	9.94788	9.9373	9.92672	9.91615	9.90557	9.89499	9.88442	9.87384	9.86326	9.85269	9.84211
Ghana	18.4166	19.0894	19.7622	20.435	21.1078	21.7806	22.9258	24.0709	25.2161	26.3612	27.5064	28.6515	29.7967	30.9419	32.087	33.2322
Guatemala	17.9105	18.0773	18.2441	18.411	18.5778	18.7446	18.8058	18.867	18.9282	18.9894	19.0506	19.1118	19.173	19.2342	19.2954	19.3566
Haiti	3.19561	3.18208	3.16855	3.15502	3.14149	3.12796	3.13227	3.13658	3.14089	3.14519	3.1495	3.15381	3.15812	3.16243	3.16673	3.17104
Honduras	9.51001	9.57998	9.64995	9.71993	9.7899	9.85987	9.87503	9.8902	9.90536	9.92053	9.93569	9.95086	9.96602	9.98119	9.99635	10.0115
Indonesia	717.824	726.948	736.071	745.195	754.318	763.442	769.806	776.17	782.535	788.899	795.263	801.628	807.992	814.357	820.721	827.085
Iraq	178.831	182.868	186.906	190.943	194.98	199.018	199.753	200.489	201.225	201.96	202.696	203.432	204.168	204.903	205.639	206.375
Jordan	22.9073	23.4288	23.9504	24.472	24.9935	25.5151	25.5957	25.6763	25.7569	25.8375	25.9181	25.9987	26.0793	26.1599	26.2405	26.3211
Kenya	19.6204	20.3981	21.1758	21.9535	22.7312	23.5089	24.854	26.1991	27.5442	28.8893	30.2344	31.5795	32.9246	34.2697	35.6148	36.9599
Kyrgyzstan	12.7987	13.0588	13.3189	13.5789	13.839	14.099	14.2538	14.4085	14.5633	14.718	14.8728	15.0275	15.1823	15.337	15.4918	15.6465
Lao People's Dem. Rep.	21.715	21.5715	21.4281	21.2847	21.1413	20.9979	21.0425	21.0872	21.1318	21.1765	21.2211	21.2658	21.3104	21.3551	21.3997	21.4444
Lebanon	31.8548	32.0929	32.3309	32.5689	32.807	33.045	32.7136	32.3821	32.0507	31.7193	31.3878	31.0564	30.7249	30.3935	30.0621	29.7306
Mali	5.61352	5.85192	6.09033	6.32874	6.56714	6.80555	7.21014	7.61473	8.01932	8.42391	8.8285	9.23309	9.63768	10.0423	10.4469	10.8515
Mongolia	30.6865	30.8546	31.0227	31.1908	31.3589	31.5271	31.5082	31.4894	31.4706	31.4518	31.433	31.4142	31.3954	31.3766	31.3578	31.3389
Morocco	63.061	63.5043	63.9475	64.3908	64.834	65.2773	65.195	65.1127	65.0304	64.9481	64.8658	64.7835	64.7013	64.619	64.5367	64.4544
Mozambique	6.60634	6.84175	7.07716	7.31257	7.54798	7.78339	8.17526	8.56713	8.959	9.35087	9.74274	10.1346	10.5265	10.9183	11.3102	11.7021
Myanmar	52.5758	54.9892	57.3791	59.7464	62.0917	64.4157	66.3902	68.3168	70.1977	72.035	73.8308	75.5868	77.3049	78.9867	80.6337	82.2474
Namibia	4.8353	4.98402	5.13275	5.28148	5.43021	5.57893	5.80659	6.03542	6.27257	6.50973	6.74689	6.98404	7.2212	7.45835	7.69551	7.93267
Nepal	19.7555	20.1883	20.6211	21.0539	21.4868	21.9196	22.6805	23.4414	24.2023	24.9632	25.7241	26.485	27.2459	28.0068	28.7677	29.5286
Nicaragua	4.99239	5.01498	5.03757	5.06017	5.08276	5.10535	5.1155	5.12565	5.12559	5.11571	5.10582	5.09593	5.08604	5.07616	5.06627	5.05638
Niger	2.57663	2.70449	2.83236	2.96022	3.08809	3.21595	3.45975	3.70355	3.94735	4.19115	4.43495	4.67875	4.92255	5.16635	5.41015	5.65395
Nigeria	129.188	134.545	139.902	145.26	150.617	155.974	165.702	175.43	185.158	194.885	204.613	214.341	224.069	233.797	243.524	253.252
Oman	72.6265	73.9228	75.2192	76.5156	77.8119	79.1083	79.3132	79.5182	79.7232	79.9281	80.1331	80.338	80.543	80.748	80.9529	81.1579
Pakistan	299.998	301.451	302.903	304.355	305.808	307.26	314.592	321.923	329.255	336.586	343.918	351.249	358.581	365.912	373.244	380.575
Paraguay	10.4876	10.6498	10.8121	10.9743	11.1365	11.2987	11.3823	11.466	11.5496	11.6332	11.7168	11.8004	11.884	11.9676	12.0512	12.1348
Peru	57.716	57.9749	58.2339	58.4928	58.7517	59.0107	59.222	59.4334	59.6448	59.8562	60.0676	60.2789	60.4903	60.7017	60.9131	61.1244
Philippines	175.748	180.024	184.3	188.575	192.851	197.127	199.251	201.376	203.5	205.624	207.748	209.872	211.996	214.121	216.245	218.369
Qatar	95.3146	97.089	98.8635	100.638	102.412	104.187	104.477	104.767	105.056	105.346	105.636	105.926	106.216	106.505	106.795	107.085
Rep. Congo	3.2363	3.36458	3.49287	3.62115	3.74943	3.87771	4.09958	4.32145	4.54331	4.76518	4.98705	5.20892	5.43079	5.65266	5.87452	6.09639
Saudi Arabia	570.102	580.616	591.13	601.643	612.157	622.671	624.272	625.874	627.476	629.077	630.679	632.28	633.882	635.484	637.085	638.687
Senegal	8.1702	8.47481	8.77941	9.08402	9.38863	9.69323	10.2068	10.7203	11.2338	11.7473	12.2609	12.7744	13.2879	13.8014	14.3149	14.8285
South Sudan	1.56035	1.6222	1.68405	1.7459	1.80774	1.86959	1.97657	2.08354	2.19051	2.29748	2.40445	2.51142	2.61839	2.72536	2.83234	2.93931
Sri Lanka	23.9719	24.4133	24.8547	25.2961	25.7376	26.179	26.8535	27.528	28.2026	28.8771	29.5517	30.2262	30.9007	31.5753	32.2498	32.9243
Sudan	8.78631	8.94031	9.09432	9.24833	9.40234	9.55635	9.66597	9.7756	9.88522	9.99485	10.1045	10.2141	10.3237	10.4334	10.543	10.6526
Sum of emerging emitters	4767.64	4837.24	4906.85	4976.46	5046.07	5115.67	5172.88	5230.1	5287.31	5344.5	5401.69	5458.88	5516.07	5573.27	5630.46	5687.65
Tajikistan	7.20206	7.34744	7.49281	7.63819	7.78356	7.92894	7.90228	7.87562	7.84896	7.8223	7.79564	7.76898	7.74232	7.71566	7.689	7.66234
Tanzania	13.4327	13.9652	14.4976	15.0301	15.5625	16.0949	17.0158	17.9367	18.8576	19.7785	20.6994	21.6203	22.5412	23.4621	24.383	25.3039
Turkey	503.36	509.49	515.62	521.749	527.879	534.009	545.279	556.549	567.819	579.089	590.359	601.629	612.899	624.17	635.44	646.71
Turkmenistan	93.2583	95.1407	97.0232	98.9056	100.788	102.67	102.325	101.98	101.635	101.29	100.944	100.599	100.254	99.9088	99.5635	99.2183
Uganda	7.03334	7.31213	7.59092	7.86971	8.1485	8.42729	8.90947	9.39165	9.87382	10.356	10.8382	11.3204	11.8025	12.2847	12.7669	13.2491
United Arab Emirates	207.236	211.564	215.892	220.22	224.547	228.875	228.982	229.089	229.196	229.303	229.41	229.517	229.624	229.731	229.838	229.945
Viet Nam	355.2	360.434	365.668	370.902	376.136	381.37	380.185	379.001	377.816	376.632	375.447	374.262	373.078	371.893	370.709	369.524
Zambia	8.7537	9.10068	9.44767	9.79465	10.1416	10.4886	11.0887	11.6888	12.289	12.8891	13.4892	14.0893	14.6894	15.2896	15.8897	16.4898

## Sheet: WeakPolicy_2025-2040
Country	2025	2026	2027	2028	2029	2030	2031	2032	2033	2034	2035	2036	2037	2038	2039	2040
Algeria	134.292	136.284	138.275	140.267	142.258	144.25	146.696	149.142	151.588	154.034	156.48	158.926	161.372	163.818	166.264	168.71
Angola	18.1966	19.0486	19.9005	20.7525	21.6045	22.4564	24.3426	26.2287	28.1148	30.001	31.8871	33.7732	35.6594	37.5455	39.4316	41.3178
Armenia	6.29332	6.25806	6.2228	6.18754	6.15228	6.11702	6.09298	6.06894	6.0449	6.02086	5.99682	5.97278	5.94874	5.9247	5.90066	5.87662
Azerbaijan	30.6965	30.5217	30.3468	30.172	29.9972	29.8224	29.9501	30.0778	30.2054	30.3331	30.4608	30.5884	30.7161	30.8438	30.9714	31.0991
Bangladesh	124.844	129.492	134.14	138.788	143.436	148.084	160.155	172.226	184.296	196.367	208.438	220.509	232.579	244.65	256.721	268.792
Benin	8.09728	8.4764	8.85552	9.23464	9.61376	9.99287	10.8322	11.6715	12.5108	13.3408	14.1703	14.9999	15.8294	16.6589	17.4885	18.318
Bolivia	26.9519	27.3732	27.7945	28.2158	28.6371	29.0584	29.4541	29.8498	30.2455	30.6411	31.0368	31.4325	31.8282	32.2239	32.6196	33.0153
Botswana	9.10917	9.50762	9.90607	10.3045	10.703	11.1014	11.8378	12.5742	13.3105	14.0469	14.7833	15.5196	16.256	16.9923	17.7287	18.4651
Cambodia	14.4611	14.4006	14.3401	14.2796	14.2191	14.1586	14.4829	14.8072	15.1316	15.4559	15.7802	16.1045	16.4288	16.7531	17.0775	17.4018
Cameroon	6.80794	7.08562	7.3633	7.64098	7.91866	8.19634	8.79719	9.39804	9.9989	10.5998	11.2006	11.8015	12.4023	13.0032	13.604	14.2049
Chile	94.0618	94.7053	95.3488	95.9924	96.6359	97.2794	98.0303	98.7813	99.5322	100.283	101.034	101.785	102.536	103.287	104.038	104.789
Colombia	86.7968	89.2777	91.7585	94.2394	96.7203	99.2012	102.851	106.5	110.15	113.8	117.449	121.099	124.749	128.398	132.048	135.698
Cote d'Ivoire	12.0452	12.5122	12.9792	13.4462	13.9132	14.3802	15.3842	16.3883	17.3924	18.3964	19.4005	20.4046	21.4086	22.4127	23.4168	24.4208
Dem. Rep. Congo	2.48331	2.60359	2.72388	2.84416	2.96444	3.08473	3.34235	3.59997	3.85759	4.11522	4.37284	4.63046	4.88808	5.14571	5.40333	5.66095
Egypt	256.262	259.688	263.114	266.54	269.966	273.391	279.869	286.347	292.824	299.302	305.779	312.257	318.735	325.212	331.69	338.167
Eritrea	0.964571	1.00993	1.0553	1.10066	1.14602	1.19138	1.2921	1.39283	1.49355	1.59428	1.695	1.79573	1.89645	1.99717	2.0979	2.19862
Ethiopia	18.7064	19.5429	20.3795	21.216	22.0526	22.8891	24.6709	26.4527	28.2345	30.0163	31.7982	33.58	35.3618	37.1436	38.9254	40.7072
Georgia	10.8177	10.5524	10.287	10.0217	9.75633	9.49099	9.56202	9.63305	9.70409	9.77512	9.84615	9.91719	9.98822	10.0593	10.1303	10.2013
Ghana	17.7838	18.562	19.3403	20.1186	20.8968	21.6751	23.3779	25.0807	26.7836	28.4864	30.1892	31.892	33.5948	35.2977	37.0005	38.7033
Guatemala	17.4165	17.8277	18.2389	18.65	19.0612	19.4724	19.7549	20.0374	20.32	20.6025	20.885	21.1675	21.4501	21.7326	22.0151	22.2976
Haiti	3.09494	3.11428	3.13361	3.15295	3.17228	3.19162	3.21928	3.24695	3.27462	3.30228	3.32995	3.35762	3.38529	3.41295	3.44062	3.46829
Honduras	9.24767	9.44809	9.64852	9.84895	10.0494	10.2498	10.3789	10.508	10.6371	10.7661	10.8952	11.0243	11.1534	11.2825	11.4116	11.5407
Indonesia	690.84	704.025	717.21	730.395	743.581	756.766	773.358	789.951	806.543	823.136	839.728	856.321	872.913	889.506	906.098	922.691
Iraq	172.69	177.86	183.029	188.199	193.368	198.538	203.111	207.685	212.258	216.832	221.405	225.979	230.553	235.126	239.7	244.273
Jordan	22.1207	22.787	23.4534	24.1198	24.7862	25.4526	26.0227	26.5928	27.1629	27.733	28.3031	28.8732	29.4433	30.0134	30.5835	31.1536
Kenya	18.9457	19.8327	20.7197	21.6068	22.4938	23.3809	25.3446	27.3084	29.2722	31.236	33.1997	35.1635	37.1273	39.0911	41.0548	43.0186
Kyrgyzstan	12.466	12.7298	12.9936	13.2575	13.5213	13.7851	13.9288	14.0724	14.216	14.3597	14.5033	14.647	14.7906	14.9342	15.0779	15.2215
Lao People's Dem. Rep.	20.8616	20.7743	20.687	20.5997	20.5124	20.4251	20.893	21.3608	21.8287	22.2966	22.7644	23.2323	23.7001	24.168	24.6358	25.1037
Lebanon	30.7607	31.2202	31.6796	32.1391	32.5986	33.058	33.2812	33.5043	33.7275	33.9506	34.1737	34.3969	34.62	34.8431	35.0663	35.2894
Mali	5.42033	5.6892	5.95808	6.22695	6.49583	6.7647	7.35056	7.93642	8.52227	9.10813	9.69399	10.2798	10.8657	11.4516	12.0374	12.6233
Mongolia	29.492	30.1955	30.8991	31.6026	32.3061	33.0096	32.6399	32.2703	31.9006	31.5309	31.1612	30.7916	30.4219	30.0522	29.6826	29.3129
Morocco	60.6489	61.2855	61.9221	62.5587	63.1953	63.8319	64.4298	65.0278	65.6257	66.2237	66.8216	67.4196	68.0175	68.6155	69.2134	69.8114
Mozambique	6.37937	6.65291	6.92644	7.19997	7.47351	7.74704	8.33544	8.92384	9.51223	10.1006	10.689	11.2774	11.8658	12.4542	13.0426	13.631
Myanmar	50.6765	53.3011	55.9256	58.5502	61.1747	63.7992	66.657	69.5147	72.3725	75.2302	78.0879	80.9457	83.8034	86.6612	89.5189	92.3767
Namibia	4.66932	4.84708	5.02484	5.2026	5.38036	5.55812	5.91821	6.28281	6.65371	7.02462	7.39553	7.76643	8.13734	8.50824	8.87915	9.25006
Nepal	18.1716	18.5697	18.9678	19.3659	19.764	20.1621	20.8684	21.5747	22.2811	22.9874	23.6937	24.4	25.1063	25.8126	26.5189	27.2253
Nicaragua	4.8546	4.94619	5.03779	5.12938	5.22098	5.31257	5.38213	5.45168	5.50229	5.54927	5.59624	5.64322	5.69019	5.73717	5.78415	5.83112
Niger	2.48775	2.62862	2.76949	2.91037	3.05124	3.19212	3.52968	3.86725	4.20482	4.54238	4.87995	5.21752	5.55509	5.89265	6.23022	6.56779
Nigeria	124.743	130.808	136.873	142.939	149.004	155.069	169.028	182.987	196.946	210.906	224.865	238.824	252.783	266.743	280.702	294.661
Oman	70.1682	71.9744	73.7805	75.5867	77.3928	79.1989	80.6346	82.0703	83.506	84.9417	86.3774	87.8131	89.2488	90.6845	92.1202	93.5559
Pakistan	285.165	291.057	296.949	302.841	308.733	314.625	324.882	335.139	345.395	355.652	365.909	376.166	386.423	396.68	406.937	417.194
Paraguay	10.2418	10.5587	10.8756	11.1924	11.5093	11.8262	12.0848	12.3434	12.602	12.8606	13.1192	13.3778	13.6364	13.895	14.1536	14.4122
Peru	57.0084	57.8995	58.7906	59.6817	60.5728	61.4639	62.3009	63.1378	63.9748	64.8117	65.6487	66.4856	67.3226	68.1595	68.9965	69.8334
Philippines	168.585	173.189	177.793	182.397	187	191.604	196.088	200.572	205.056	209.539	214.023	218.507	222.991	227.475	231.958	236.442
Qatar	92.0883	94.5287	96.9691	99.4095	101.85	104.29	106.204	108.117	110.031	111.944	113.858	115.771	117.685	119.598	121.512	123.425
Rep. Congo	3.12501	3.27133	3.41764	3.56395	3.71027	3.85658	4.1805	4.50442	4.82833	5.15225	5.47617	5.80008	6.124	6.44792	6.77184	7.09575
Saudi Arabia	560.769	574.766	588.764	602.761	616.758	630.756	644.121	657.486	670.852	684.217	697.583	710.948	724.313	737.679	751.044	764.409
Senegal	7.8894	8.24049	8.59158	8.94268	9.29377	9.64486	10.4071	11.1693	11.9316	12.6938	13.456	14.2183	14.9805	15.7427	16.505	17.2672
South Sudan	1.50669	1.57723	1.64778	1.71832	1.78886	1.85941	2.01558	2.17175	2.32793	2.4841	2.64027	2.79645	2.95262	3.10879	3.26496	3.42114
Sri Lanka	23.4202	23.8514	24.2827	24.7139	25.1452	25.5764	26.2355	26.8945	27.5535	28.2125	28.8715	29.5305	30.1895	30.8485	31.5076	32.1666
Sudan	8.45031	8.62752	8.80473	8.98193	9.15914	9.33635	9.55547	9.7746	9.99372	10.2128	10.432	10.6511	10.8702	11.0893	11.3085	11.5276
Sum of emerging emitters	4599.75	4705.83	4811.9	4917.97	5024.04	5130.11	5274.17	5418.23	5562.28	5706.32	5850.35	5994.39	6138.43	6282.46	6426.5	6570.53
Tajikistan	6.9301	7.09714	7.26419	7.43123	7.59827	7.76532	7.8556	7.94589	8.03617	8.12646	8.21674	8.30702	8.39731	8.48759	8.57788	8.66816
Tanzania	12.9708	13.5781	14.1854	14.7927	15.4	16.0073	17.3517	18.6962	20.0406	21.3851	22.7296	24.074	25.4185	26.7629	28.1074	29.4519
Turkey	481.294	490.26	499.225	508.19	517.156	526.121	542.506	558.892	575.277	591.662	608.048	624.433	640.818	657.204	673.589	689.975
Turkmenistan	89.7367	91.8998	94.0628	96.2258	98.3888	100.552	101.721	102.89	104.059	105.228	106.397	107.566	108.735	109.904	111.074	112.243
Uganda	6.79148	7.10946	7.42744	7.74542	8.0634	8.38138	9.08533	9.78929	10.4932	11.1972	11.9012	12.6051	13.3091	14.013	14.717	15.421
United Arab Emirates	200.121	205.776	211.431	217.086	222.741	228.396	232.782	237.169	241.555	245.941	250.328	254.714	259.1	263.487	267.873	272.26
Viet Nam	332.642	341.742	350.842	359.943	369.043	378.143	384.918	391.692	398.467	405.241	412.016	418.791	425.565	432.34	439.114	445.889
Zambia	8.45268	8.84843	9.24419	9.63995	10.0357	10.4315	11.3076	12.1838	13.0599	13.936	14.8122	15.6883	16.5645	17.4406	18.3168	19.1929

## Sheet: LowCarbon_2025-2040
Country	2025	2026	2027	2028	2029	2030	2031	2032	2033	2034	2035	2036	2037	2038	2039	2040
Algeria	134.23	136.16	138.09	140.019	141.949	143.879	145.091	146.304	147.516	148.729	149.942	151.154	152.367	153.579	154.792	156.005
Angola	18.179	19.0135	19.8479	20.6823	21.5167	22.3511	23.7522	25.1533	26.5543	27.9554	29.3565	30.7575	32.1586	33.5596	34.9607	36.3618
Armenia	6.29332	6.25806	6.2228	6.18754	6.15228	6.11702	6.09284	6.06865	6.04446	6.02028	5.99609	5.9719	5.94772	5.92353	5.89934	5.87516
Azerbaijan	30.6907	30.51	30.3294	30.1488	29.9682	29.7876	29.7608	29.7341	29.7073	29.6806	29.6538	29.6271	29.6003	29.5736	29.5468	29.5201
Bangladesh	124.336	128.476	132.615	136.755	140.895	145.035	149.706	154.378	159.05	163.721	168.393	173.065	177.736	182.408	187.08	191.751
Benin	8.08947	8.46078	8.83209	9.2034	9.57471	9.94601	10.5695	11.1929	11.8164	12.4339	13.0484	13.6629	14.2775	14.892	15.5065	16.121
Bolivia	26.9133	27.296	27.6787	28.0614	28.4441	28.8268	28.9756	29.1244	29.2733	29.4221	29.5709	29.7198	29.8686	30.0174	30.1663	30.3151
Botswana	9.09946	9.48821	9.87695	10.2657	10.6544	11.0432	11.5421	12.041	12.54	13.0389	13.5378	14.0368	14.5357	15.0346	15.5335	16.0325
Cambodia	14.4565	14.3914	14.3263	14.2612	14.1961	14.131	14.2543	14.3777	14.501	14.6243	14.7477	14.871	14.9943	15.1177	15.241	15.3643
Cameroon	6.80133	7.07239	7.34345	7.61452	7.88558	8.15665	8.59089	9.02514	9.45938	9.89363	10.3279	10.7621	11.1964	11.6306	12.0649	12.4991
Chile	94.0384	94.6585	95.2786	95.8986	96.5187	97.1388	97.6266	98.1144	98.6022	99.0901	99.5779	100.066	100.553	101.041	101.529	102.017
Colombia	86.7005	89.0852	91.4698	93.8544	96.2391	98.6237	101.776	104.928	108.08	111.232	114.384	117.536	120.689	123.841	126.993	130.145
Cote d'Ivoire	12.0335	12.4888	12.944	13.3993	13.8545	14.3098	15.0275	15.7453	16.463	17.1808	17.8985	18.6162	19.334	20.0517	20.7694	21.4872
Dem. Rep. Congo	2.48092	2.59881	2.71671	2.8346	2.9525	3.07039	3.26156	3.45274	3.64391	3.83509	4.02626	4.21744	4.40861	4.59979	4.79096	4.98214
Egypt	255.856	258.877	261.897	264.917	267.938	270.958	272.016	273.074	274.132	275.19	276.248	277.306	278.364	279.423	280.481	281.539
Eritrea	0.963548	1.00789	1.05222	1.09656	1.1409	1.18524	1.25763	1.33002	1.40241	1.4748	1.5472	1.61959	1.69198	1.76437	1.83676	1.90915
Ethiopia	18.6883	19.5067	20.3252	21.1436	21.9621	22.7806	24.0848	25.389	26.6931	27.9973	29.3015	30.6057	31.9099	33.2141	34.5183	35.8225
Georgia	10.8177	10.5524	10.287	10.0217	9.75633	9.49099	9.50702	9.52305	9.53909	9.55512	9.57116	9.58719	9.60322	9.61926	9.63529	9.65132
Ghana	17.7665	18.5276	19.2886	20.0497	20.8107	21.5718	22.8204	24.0691	25.3177	26.5664	27.815	29.0636	30.3123	31.5609	32.8096	34.0582
Guatemala	17.3848	17.7643	18.1438	18.5232	18.9027	19.2821	19.3845	19.4868	19.5891	19.6915	19.7938	19.8961	19.9985	20.1008	20.2032	20.3055
Haiti	3.09079	3.10598	3.12116	3.13634	3.15152	3.1667	3.17486	3.18302	3.19118	3.19933	3.20749	3.21565	3.2238	3.23196	3.24012	3.24827
Honduras	9.23083	9.41442	9.59801	9.78159	9.96518	10.1488	10.1848	10.2208	10.2567	10.2927	10.3287	10.3647	10.4007	10.4367	10.4727	10.5087
Indonesia	690.259	702.864	715.469	728.073	740.678	753.283	761.671	770.059	778.446	786.834	795.222	803.61	811.998	820.385	828.773	837.161
Iraq	172.493	177.466	182.438	187.411	192.383	197.356	199.293	201.23	203.168	205.105	207.043	208.98	210.917	212.855	214.792	216.73
Jordan	22.0954	22.7366	23.3777	24.0189	24.6601	25.3012	25.5352	25.7692	26.0031	26.2371	26.4711	26.705	26.939	27.173	27.4069	27.6409
Kenya	18.9274	19.7961	20.6649	21.5337	22.4025	23.2712	24.73	26.1887	27.6474	29.1062	30.5649	32.0237	33.4824	34.9411	36.3999	37.8586
Kyrgyzstan	12.4645	12.7269	12.9893	13.2517	13.5141	13.7765	13.9188	14.0611	14.2034	14.3457	14.488	14.6303	14.7726	14.9149	15.0572	15.1995
Lao People's Dem. Rep.	20.8549	20.761	20.6671	20.5732	20.4792	20.3853	20.5632	20.7412	20.9191	21.097	21.2749	21.4528	21.6308	21.8087	21.9866	22.1645
Lebanon	30.7256	31.1499	31.5743	31.9986	32.4229	32.8473	32.6922	32.5372	32.3822	32.2271	32.0721	31.917	31.762	31.607	31.4519	31.2969
Mali	5.41512	5.67879	5.94246	6.20613	6.4698	6.73347	7.17111	7.60876	8.04641	8.48405	8.9217	9.35934	9.79699	10.2346	10.6723	11.1099
Mongolia	29.4126	30.0367	30.6609	31.285	31.9091	32.5332	32.2411	31.9491	31.6571	31.365	31.073	30.781	30.4889	30.1969	29.9048	29.6128
Morocco	60.621	61.2297	61.8384	62.4471	63.0559	63.6646	63.7532	63.8418	63.9305	64.0191	64.1078	64.1964	64.285	64.3737	64.4623	64.551
Mozambique	6.37319	6.64054	6.90789	7.17524	7.44258	7.70993	8.13842	8.56691	8.99539	9.42388	9.85236	10.2808	10.7093	11.1378	11.5663	11.9948
Myanmar	50.6389	53.2227	55.8036	58.3817	60.957	63.5297	65.7095	67.8543	69.9656	72.0452	74.0943	76.1144	78.1068	80.0725	82.0129	83.929
Namibia	4.66477	4.83798	5.01119	5.18441	5.35762	5.53083	5.78361	6.03868	6.30117	6.56366	6.82615	7.08864	7.35113	7.61362	7.8761	8.13859
Nepal	18.1716	18.5697	18.9678	19.3659	19.764	20.1621	20.862	21.5619	22.2618	22.9617	23.6616	24.3615	25.0614	25.7613	26.4612	27.1611
Nicaragua	4.84576	4.92852	5.01127	5.09403	5.17679	5.25954	5.2806	5.30167	5.30859	5.3087	5.30882	5.30894	5.30905	5.30917	5.30929	5.30941
Niger	2.48539	2.6239	2.76241	2.90093	3.03944	3.17796	3.43831	3.69866	3.95901	4.21936	4.47971	4.74006	5.00041	5.26076	5.52111	5.78146
Nigeria	124.623	130.568	136.513	142.459	148.404	154.349	164.847	175.345	185.843	196.341	206.839	217.337	227.835	238.333	248.831	259.329
Oman	70.0954	71.8287	73.562	75.2953	77.0286	78.7619	79.2818	79.8016	80.3215	80.8414	81.3612	81.8811	82.4009	82.9208	83.4406	83.9605
Pakistan	284.596	289.918	295.241	300.563	305.886	311.208	318.341	325.473	332.605	339.738	346.87	354.003	361.135	368.268	375.4	382.532
Paraguay	10.2217	10.5184	10.8151	11.1118	11.4085	11.7052	11.8194	11.9337	12.0479	12.1621	12.2764	12.3906	12.5048	12.619	12.7333	12.8475
Peru	56.9267	57.7362	58.5456	59.3551	60.1645	60.974	61.2888	61.6036	61.9184	62.2332	62.548	62.8628	63.1776	63.4924	63.8072	64.1221
Philippines	168.505	173.03	177.555	182.079	186.604	191.128	193.936	196.744	199.551	202.359	205.167	207.974	210.782	213.59	216.397	219.205
Qatar	91.9927	94.3376	96.6824	99.0273	101.372	103.717	104.422	105.127	105.832	106.537	107.243	107.948	108.653	109.358	110.063	110.768
Rep. Congo	3.122	3.2653	3.4086	3.5519	3.6952	3.8385	4.07911	4.31972	4.56034	4.80095	5.04156	5.28218	5.52279	5.7634	6.00402	6.24463
Saudi Arabia	560.202	573.633	587.064	600.495	613.925	627.356	632.676	637.996	643.316	648.636	653.957	659.277	664.597	669.917	675.237	680.557
Senegal	7.88177	8.22523	8.56869	8.91215	9.25561	9.59907	10.1587	10.7183	11.2779	11.8375	12.3971	12.9567	13.5163	14.0759	14.6355	15.1951
South Sudan	1.50524	1.57433	1.64342	1.71251	1.7816	1.85069	1.9667	2.08271	2.19872	2.31472	2.43073	2.54674	2.66275	2.77876	2.89477	3.01078
Sri Lanka	23.4202	23.8514	24.2827	24.7139	25.1452	25.5764	26.2355	26.8945	27.5535	28.2125	28.8715	29.5305	30.1895	30.8485	31.5076	32.1666
Sudan	8.44642	8.61973	8.79304	8.96635	9.13967	9.31298	9.4477	9.58243	9.71715	9.85188	9.9866	10.1213	10.2561	10.3908	10.5255	10.6602
Sum of emerging emitters	4594.56	4695.44	4796.32	4897.2	4998.08	5098.96	5176.36	5253.76	5331.16	5408.54	5485.93	5563.31	5640.69	5718.07	5795.45	5872.84
Tajikistan	6.92646	7.08987	7.25327	7.41668	7.58008	7.74349	7.75215	7.76082	7.76948	7.77815	7.78681	7.79548	7.80414	7.81281	7.82147	7.83014
Tanzania	12.9583	13.5531	14.1478	14.7426	15.3374	15.9322	16.9309	17.9296	18.9283	19.927	20.9257	21.9244	22.9231	23.9218	24.9205	25.9192
Turkey	480.886	489.442	497.999	506.555	515.112	523.668	535.652	547.636	559.619	571.603	583.587	595.571	607.555	619.538	631.522	643.506
Turkmenistan	89.6896	91.8055	93.9214	96.0373	98.1532	100.269	100.381	100.494	100.606	100.718	100.83	100.942	101.055	101.167	101.279	101.391
Uganda	6.78493	7.09636	7.40779	7.71922	8.03064	8.34207	8.86499	9.38791	9.91082	10.4337	10.9567	11.4796	12.0025	12.5254	13.0483	13.5712
United Arab Emirates	199.892	205.319	210.745	216.172	221.599	227.025	228.478	229.93	231.382	232.835	234.287	235.739	237.191	238.644	240.096	241.548
Viet Nam	332.101	340.661	349.221	357.781	366.341	374.901	375.67	376.438	377.207	377.976	378.745	379.513	380.282	381.051	381.819	382.588
Zambia	8.44452	8.83213	9.21973	9.60734	9.99494	10.3825	11.0334	11.6842	12.335	12.9858	13.6367	14.2875	14.9383	15.5891	16.2399	16.8908

## Sheet: ExtremeLC_2025-2040
Country	2025	2026	2027	2028	2029	2030	2031	2032	2033	2034	2035	2036	2037	2038	2039	2040
Algeria	133.822	135.344	136.865	138.387	139.909	141.43	142.221	143.012	143.802	144.593	145.384	146.175	146.965	147.756	148.547	149.338
Angola	18.0605	18.7764	19.4923	20.2082	20.924	21.6399	22.8781	24.1162	25.3544	26.5926	27.8307	29.0689	30.307	31.5452	32.7834	34.0215
Armenia	6.29332	6.25806	6.2228	6.18754	6.15228	6.11702	6.09276	6.0685	6.04424	6.01999	5.99573	5.97147	5.94721	5.92295	5.89869	5.87443
Azerbaijan	30.6527	30.4341	30.2156	29.997	29.7784	29.5598	29.4685	29.3772	29.2858	29.1945	29.1031	29.0118	28.9205	28.8291	28.7378	28.6464
Bangladesh	120.463	120.73	120.996	121.263	121.53	121.797	123.826	125.855	127.885	129.914	131.943	133.973	136.002	138.031	140.06	142.09
Benin	8.03673	8.35529	8.67385	8.99241	9.31097	9.62954	10.1805	10.7315	11.2824	11.8296	12.3722	12.9147	13.4573	13.9999	14.5424	15.085
Bolivia	26.6502	26.7698	26.8893	27.0089	27.1285	27.248	27.3456	27.4432	27.5408	27.6384	27.736	27.8336	27.9312	28.0288	28.1264	28.224
Botswana	9.04506	9.3794	9.71373	10.0481	10.3824	10.7167	11.122	11.5273	11.9326	12.3379	12.7432	13.1485	13.5538	13.9591	14.3643	14.7696
Cambodia	14.4264	14.3311	14.2358	14.1405	14.0452	13.95	13.9796	14.0093	14.039	14.0686	14.0983	14.1279	14.1576	14.1873	14.2169	14.2466
Cameroon	6.7567	6.98314	7.20958	7.43602	7.66246	7.8889	8.26826	8.64762	9.02698	9.40634	9.7857	10.1651	10.5444	10.9238	11.3031	11.6825
Chile	93.8849	94.3516	94.8182	95.2848	95.7515	96.2181	96.6499	97.0816	97.5134	97.9452	98.3769	98.8087	99.2405	99.6722	100.104	100.536
Colombia	86.0499	87.7838	89.5177	91.2517	92.9856	94.7195	97.8835	101.047	104.211	107.375	110.539	113.703	116.867	120.031	123.195	126.359
Cote d'Ivoire	11.9544	12.3306	12.7068	13.083	13.4591	13.8353	14.4594	15.0835	15.7076	16.3318	16.9559	17.58	18.2041	18.8282	19.4523	20.0764
Dem. Rep. Congo	2.46478	2.56653	2.66828	2.77003	2.87178	2.97353	3.14245	3.31138	3.48031	3.64923	3.81816	3.98709	4.15601	4.32494	4.49387	4.66279
Egypt	253.08	253.324	253.567	253.811	254.055	254.299	253.359	252.419	251.479	250.539	249.6	248.66	247.72	246.78	245.84	244.9
Eritrea	0.957808	0.996407	1.03501	1.0736	1.1122	1.1508	1.21169	1.27258	1.33347	1.39435	1.45524	1.51613	1.57702	1.63791	1.6988	1.75968
Ethiopia	18.5661	19.2624	19.9587	20.655	21.3514	22.0477	23.1934	24.3391	25.4848	26.6305	27.7762	28.9219	30.0676	31.2133	32.3591	33.5048
Georgia	10.8177	10.5524	10.287	10.0217	9.75633	9.49099	9.48089	9.4708	9.46071	9.45062	9.44053	9.43044	9.42035	9.41026	9.40017	9.39007
Ghana	17.6503	18.2951	18.9399	19.5847	20.2295	20.8743	21.9718	23.0693	24.1668	25.2643	26.3619	27.4594	28.5569	29.6544	30.7519	31.8494
Guatemala	17.1653	17.3251	17.485	17.6449	17.8048	17.9646	18.0233	18.082	18.1406	18.1993	18.2579	18.3166	18.3752	18.4339	18.4925	18.5512
Haiti	3.06264	3.04968	3.03671	3.02374	3.01078	2.99781	3.00194	3.00607	3.01019	3.01432	3.01845	3.02258	3.02671	3.03084	3.03497	3.03909
Honduras	9.1143	9.18136	9.24842	9.31548	9.38254	9.4496	9.46413	9.47867	9.4932	9.50774	9.52227	9.5368	9.55134	9.56587	9.58041	9.59494
Indonesia	686.378	695.102	703.826	712.55	721.273	729.997	736.083	742.168	748.254	754.339	760.425	766.51	772.596	778.681	784.767	790.853
Iraq	171.39	175.259	179.129	182.998	186.867	190.737	191.442	192.147	192.852	193.557	194.262	194.967	195.672	196.377	197.082	197.787
Jordan	21.9541	22.454	22.9538	23.4537	23.9535	24.4534	24.5306	24.6079	24.6851	24.7624	24.8396	24.9169	24.9941	25.0714	25.1486	25.2258
Kenya	18.804	19.5493	20.2947	21.04	21.7854	22.5307	23.8199	25.109	26.3981	27.6872	28.9764	30.2655	31.5546	32.8438	34.1329	35.422
Kyrgyzstan	12.4552	12.7083	12.9614	13.2144	13.4675	13.7206	13.8712	14.0218	14.1724	14.323	14.4736	14.6242	14.7748	14.9254	15.076	15.2266
Lao People's Dem. Rep.	20.8114	20.674	20.5365	20.399	20.2616	20.1241	20.1669	20.2097	20.2525	20.2953	20.3381	20.3809	20.4237	20.4665	20.5093	20.5521
Lebanon	30.5294	30.7575	30.9856	31.2138	31.4419	31.67	31.3524	31.0347	30.7171	30.3994	30.0818	29.7641	29.4465	29.1288	28.8112	28.4935
Mali	5.37994	5.60842	5.83691	6.0654	6.29388	6.52237	6.91013	7.29788	7.68564	8.07339	8.46115	8.84891	9.23666	9.62442	10.0122	10.3999
Mongolia	28.9471	29.1057	29.2643	29.4229	29.5814	29.74	29.7223	29.7045	29.6868	29.669	29.6513	29.6335	29.6158	29.5981	29.5803	29.5626
Morocco	60.4371	60.8619	61.2867	61.7115	62.1363	62.5611	62.4822	62.4034	62.3245	62.2456	62.1668	62.0879	62.0091	61.9302	61.8513	61.7725
Mozambique	6.33145	6.55707	6.78268	7.0083	7.23391	7.45952	7.83509	8.21065	8.58622	8.96178	9.33734	9.71291	10.0885	10.464	10.8396	11.2152
Myanmar	50.3882	52.7011	54.9916	57.2603	59.508	61.7353	63.6277	65.4741	67.2768	69.0377	70.7587	72.4417	74.0883	75.7001	77.2785	78.8251
Namibia	4.6341	4.77664	4.91918	5.06172	5.20426	5.34679	5.56498	5.78428	6.01157	6.23886	6.46615	6.69344	6.92073	7.14801	7.3753	7.60259
Nepal	18.1716	18.5697	18.9678	19.3659	19.764	20.1621	20.862	21.5619	22.2618	22.9617	23.6616	24.3615	25.0614	25.7613	26.4612	27.1611
Nicaragua	4.78465	4.80631	4.82796	4.84961	4.87127	4.89292	4.90264	4.91237	4.91232	4.90284	4.89337	4.88389	4.87441	4.86494	4.85546	4.84599
Niger	2.46942	2.59196	2.7145	2.83705	2.95959	3.08214	3.31579	3.54945	3.7831	4.01676	4.25041	4.48407	4.71772	4.95138	5.18503	5.41869
Nigeria	123.812	128.947	134.081	139.216	144.35	149.484	158.807	168.13	177.453	186.776	196.099	205.422	214.745	224.068	233.391	242.714
Oman	69.6045	70.8469	72.0893	73.3318	74.5742	75.8166	76.013	76.2095	76.4059	76.6023	76.7988	76.9952	77.1916	77.388	77.5845	77.7809
Pakistan	280.632	281.99	283.349	284.708	286.066	287.425	294.283	301.141	307.999	314.858	321.716	328.574	335.432	342.291	349.149	356.007
Paraguay	10.0809	10.2369	10.3928	10.5487	10.7047	10.8606	10.941	11.0213	11.1017	11.1821	11.2624	11.3428	11.4232	11.5035	11.5839	11.6643
Peru	56.3701	56.623	56.8759	57.1288	57.3817	57.6346	57.8411	58.0475	58.254	58.4604	58.6669	58.8733	59.0798	59.2862	59.4927	59.6991
Philippines	168.07	172.159	176.248	180.337	184.427	188.516	190.547	192.578	194.61	196.641	198.673	200.704	202.735	204.767	206.798	208.829
Qatar	91.3485	93.0492	94.7498	96.4505	98.1511	99.8517	100.13	100.407	100.685	100.963	101.241	101.518	101.796	102.074	102.352	102.629
Rep. Congo	3.10164	3.22458	3.34753	3.47047	3.59341	3.71636	3.92899	4.14163	4.35427	4.5669	4.77954	4.99218	5.20481	5.41745	5.63009	5.84272
Saudi Arabia	557.044	567.317	577.59	587.863	598.136	608.408	609.973	611.538	613.103	614.668	616.233	617.798	619.363	620.928	622.493	624.058
Senegal	7.83024	8.12217	8.4141	8.70603	8.99797	9.2899	9.78205	10.2742	10.7664	11.2585	11.7507	12.2428	12.735	13.2272	13.7193	14.2115
South Sudan	1.49542	1.5547	1.61397	1.67325	1.73252	1.7918	1.89432	1.99684	2.09936	2.20188	2.3044	2.40692	2.50944	2.61196	2.71448	2.817
Sri Lanka	23.4202	23.8514	24.2827	24.7139	25.1452	25.5764	26.2355	26.8945	27.5535	28.2125	28.8715	29.5305	30.1895	30.8485	31.5076	32.1666
Sudan	8.42071	8.56831	8.71591	8.86351	9.01111	9.15871	9.26377	9.36884	9.4739	9.57896	9.68403	9.78909	9.89416	9.99922	10.1043	10.2093
Sum of emerging emitters	4560.32	4626.95	4693.58	4760.22	4826.85	4893.48	4948.06	5002.63	5057.21	5111.77	5166.32	5220.88	5275.43	5329.99	5384.55	5439.1
Tajikistan	6.90238	7.04171	7.18104	7.32036	7.45969	7.59902	7.57346	7.54791	7.52236	7.49681	7.47126	7.44571	7.42016	7.39461	7.36906	7.34351
Tanzania	12.8738	13.3841	13.8944	14.4047	14.9149	15.4252	16.3078	17.1904	18.073	18.9555	19.8381	20.7207	21.6033	22.4858	23.3684	24.251
Turkey	478.152	483.974	489.797	495.62	501.443	507.266	517.971	528.677	539.383	550.088	560.794	571.5	582.205	592.911	603.617	614.322
Turkmenistan	89.3778	91.182	92.9861	94.7902	96.5943	98.3984	98.0675	97.7367	97.4058	97.075	96.7441	96.4133	96.0824	95.7516	95.4207	95.0899
Uganda	6.74069	7.00788	7.27506	7.54225	7.80944	8.07663	8.53875	9.00086	9.46298	9.92509	10.3872	10.8493	11.3114	11.7736	12.2357	12.6978
United Arab Emirates	198.613	202.761	206.909	211.056	215.204	219.352	219.454	219.557	219.659	219.762	219.865	219.967	220.07	220.172	220.275	220.377
Viet Nam	328.38	333.219	338.058	342.897	347.735	352.574	351.479	350.384	349.289	348.194	347.099	346.003	344.908	343.813	342.718	341.623
Zambia	8.38946	8.72201	9.05455	9.38709	9.71964	10.0522	10.6273	11.2025	11.7776	12.3528	12.9279	13.5031	14.0782	14.6534	15.2285	15.8037

[truncated: 3 more sheets: Severe_NP_2025-2040, Severe_LC_2025-2040, Severe_eLC_2025-2040]
