# Supplementary material for: Global mitigation efforts should prioritize support to the emerging emitters
Source: Research Square preprint supplement (doi:10.21203/rs.3.rs-376475/v1), 2021-04-09
Supplement: Supplementary file 5 [file 06f5b67a316b729fdbea2ade.xlsx]

## Sheet: Intro
	Definition of lockdown scenarios over 2020-2024.
	DIMENSION	Baseline	Mild lockdown	Default lockdown	Severe lockdown
	Number of lockdowns	0	2	4	8
	Duration	-	Tmild	Tdefault	Tsevere
	Strictness	-	Smild	Sdefault	Ssevere
	For detailed information about the scenario settings, see SI section 2.1.3.
	CO2 emissions data provided in this file are all in Mt (10^6 tonne CO2).

## Sheet: Baseline_2020-2024
Country	2020	2021	2022	2023	2024
Algeria	141.029	139.839	139.022	138.18	137.321
Angola	18.9427	18.6693	18.448	18.2256	18.0028
Armenia	5.78425	5.95034	6.12137	6.29751	6.4789
Azerbaijan	31.5782	31.3655	31.1524	30.9391	30.7259
Bangladesh	99.7601	105.821	112.236	119.027	126.215
Benin	7.60942	7.69391	7.79973	7.90536	8.01104
Bolivia	23.321	24.287	25.293	26.3406	27.4316
Botswana	8.71721	8.78116	8.86876	8.95537	9.04126
Cambodia	12.1886	12.8735	13.6005	14.3722	15.1914
Cameroon	6.46386	6.52915	6.61238	6.69529	6.77806
Chile	89.5663	90.7479	91.9606	93.2051	94.4823
Colombia	77.4806	79.5634	81.7019	83.8974	86.1516
Cote d'Ivoire	10.6468	10.9542	11.3	11.6543	12.0176
Dem. Rep. Congo	2.2019	2.25798	2.32156	2.38643	2.45269
Egypt	235.936	241.117	246.42	251.846	257.402
Eritrea	0.784663	0.822472	0.864362	0.908197	0.954089
Ethiopia	14.7475	15.5892	16.5221	17.5072	18.5479
Georgia	9.76856	10.1649	10.5763	11.0034	11.4467
Ghana	15.6623	16.1081	16.61	17.124	17.6508
Guatemala	17.625	17.5994	17.6199	17.6368	17.6507
Haiti	3.30707	3.27206	3.24589	3.21927	3.19232
Honduras	9.29554	9.30229	9.33345	9.36276	9.39054
Indonesia	600.848	624.011	648.036	672.955	698.801
Iraq	161.819	164.454	167.57	170.709	173.877
Jordan	23.1906	22.9149	22.7018	22.486	22.2684
Kenya	16.9018	17.3131	17.781	18.2576	18.7439
Kyrgyzstan	11.3727	11.6289	11.8911	12.1594	12.4342
Lao People's Dem. Rep.	20.0792	20.4459	20.8737	21.3062	21.7438
Lebanon	27.1309	28.1008	29.1816	30.2977	31.451
Mali	5.8304	5.69523	5.57777	5.4616	5.34693
Mongolia	24.6695	25.8949	27.1839	28.54	29.9671
Morocco	60.635	60.9337	61.3944	61.8457	62.2895
Mozambique	6.32977	6.32022	6.32723	6.33293	6.33753
Myanmar	37.5316	40.2729	43.4148	46.5685	49.7341
Namibia	4.09579	4.22287	4.3653	4.5116	4.662
Nepal	14.2576	15.2802	16.3791	17.5596	18.8273
Nicaragua	4.99187	4.97076	4.96271	4.95364	4.94374
Niger	2.38703	2.39481	2.40891	2.42259	2.43592
Nigeria	112.493	114.866	117.597	120.367	123.181
Oman	71.6338	71.3341	71.2219	71.095	70.9561
Pakistan	234.655	247.916	261.942	276.778	292.468
Paraguay	8.93234	9.23179	9.54221	9.86401	10.1976
Peru	52.7689	53.7923	54.8437	55.9239	57.0341
Philippines	145.995	151.341	156.958	162.863	169.073
Qatar	91.0775	91.4004	91.965	92.5137	93.0496
Rep. Congo	2.99115	3.01051	3.03794	3.06498	3.09173
Saudi Arabia	514.727	524.677	534.805	545.116	555.612
Senegal	8.26304	8.13632	8.03255	7.92846	7.82435
South Sudan	1.39124	1.41288	1.43862	1.46453	1.49064
Sri Lanka	21.6383	22.0765	22.5116	22.9432	23.371
Sudan	16.2162	13.8081	11.7884	10.0621	8.58704
Tajikistan	7.2711	7.19434	7.13705	7.07874	7.01969
Tanzania	11.1914	11.5599	11.9718	12.3958	12.8326
Turkey	411.336	429.56	448.594	468.476	489.243
Turkmenistan	74.0878	77.832	81.9798	86.3307	90.8968
Uganda	5.62463	5.86963	6.14134	6.42431	6.71914
United Arab Emirates	197.603	198.294	199.51	200.691	201.845
Viet Nam	261.669	279.7	298.949	319.495	341.425
Zambia	7.49641	7.69019	7.90966	8.13371	8.36264
Sum of emerging emitters	4121.15	4240.45	4368.83	4503.04	4643.35

## Sheet: Mild_2020-2024
Country	2020	2021	2022	2023	2024
Algeria	121.959	138.433	139.017	138.18	137.321
Angola	16.3812	18.4816	18.4474	18.2256	18.0028
Armenia	4.75051	5.89541	6.12119	6.29751	6.4789
Azerbaijan	26.6588	31.1375	31.1517	30.9391	30.7259
Bangladesh	89.5065	104.628	112.235	119.027	126.215
Benin	6.58043	7.61657	7.79947	7.90536	8.01104
Bolivia	19.0026	24.098	25.2923	26.3406	27.4316
Botswana	7.53842	8.69289	8.86846	8.95537	9.04126
Cambodia	11.1681	12.7009	13.6001	14.3722	15.1914
Cameroon	5.58978	6.46352	6.61216	6.69529	6.77806
Chile	72.6371	88.8446	91.9505	93.2051	94.4823
Colombia	62.9029	79.2773	81.7002	83.8974	86.1516
Cote d'Ivoire	9.20709	10.8441	11.2996	11.6543	12.0176
Dem. Rep. Congo	1.90415	2.23529	2.32148	2.38643	2.45269
Egypt	219.255	240.04	246.416	251.846	257.402
Eritrea	0.678557	0.814205	0.864333	0.908197	0.954089
Ethiopia	12.7533	15.4325	16.5216	17.5072	18.5479
Georgia	7.75221	10.0412	10.576	11.0034	11.4467
Ghana	13.5444	15.9462	16.6094	17.124	17.6508
Guatemala	15.2416	17.4225	17.6193	17.6368	17.6507
Haiti	2.85987	3.23917	3.24579	3.21927	3.19232
Honduras	8.03854	9.20879	9.33314	9.36276	9.39054
Indonesia	549.277	621.123	648.022	672.955	698.801
Iraq	139.937	162.801	167.564	170.709	173.877
Jordan	20.0546	22.6845	22.701	22.486	22.2684
Kenya	14.6162	17.1391	17.7804	18.2576	18.7439
Kyrgyzstan	9.66396	11.2989	11.8909	12.1594	12.4342
Lao People's Dem. Rep.	17.364	20.2403	20.873	21.3062	21.7438
Lebanon	23.4621	27.8183	29.1806	30.2977	31.451
Mali	5.04198	5.63798	5.57759	5.4616	5.34693
Mongolia	23.2426	25.4733	27.18	28.54	29.9671
Morocco	52.4357	60.3213	61.3923	61.8457	62.2895
Mozambique	5.47382	6.25669	6.32702	6.33293	6.33753
Myanmar	32.456	39.8673	43.4134	46.5685	49.7341
Namibia	3.54193	4.18042	4.36515	4.5116	4.662
Nepal	11.8674	15.0151	16.3787	17.5596	18.8273
Nicaragua	4.31685	4.9208	4.96254	4.95364	4.94374
Niger	2.06424	2.37074	2.40883	2.42259	2.43592
Nigeria	97.2812	113.712	117.593	120.367	123.181
Oman	61.9471	70.6171	71.2195	71.095	70.9561
Pakistan	213.147	247.12	261.94	276.778	292.468
Paraguay	8.06734	9.19618	9.54209	9.86401	10.1976
Peru	41.3456	53.3873	54.8404	55.9239	57.0341
Philippines	119.215	149.417	156.952	162.863	169.073
Qatar	78.7615	90.4817	91.9619	92.5137	93.0496
Rep. Congo	2.58667	2.98025	3.03784	3.06498	3.09173
Saudi Arabia	460.322	522.125	534.79	545.116	555.612
Senegal	7.14567	8.05454	8.03228	7.92846	7.82435
South Sudan	1.20311	1.39868	1.43857	1.46453	1.49064
Sri Lanka	18.725	21.9716	22.5114	22.9432	23.371
Sudan	14.0233	13.6693	11.788	10.0621	8.58704
Tajikistan	6.28787	7.12203	7.13681	7.07874	7.01969
Tanzania	9.67802	11.4437	11.9714	12.3958	12.8326
Turkey	356.378	427.461	448.588	468.476	489.243
Turkmenistan	64.0693	77.0497	81.9771	86.3307	90.8968
Uganda	4.86404	5.81063	6.14114	6.42431	6.71914
United Arab Emirates	170.882	196.301	199.503	200.691	201.845
Viet Nam	247.381	276.403	298.938	319.495	341.425
Zambia	6.48271	7.6129	7.9094	8.13371	8.36264
Sum of emerging emitters	3638.44	4207.61	4368.71	4503.04	4643.35

## Sheet: Default_2020-2024
Country	2020	2021	2022	2023	2024
Algeria	122.697	132.029	134.118	134.083	132.053
Angola	16.4803	17.6267	17.7974	17.6851	17.3121
Armenia	4.81444	5.55224	5.90091	6.14744	6.27876
Azerbaijan	26.9825	29.8496	30.687	31.105	30.9354
Bangladesh	89.5149	100.187	107.364	113.213	118.26
Benin	6.62027	7.26425	7.52463	7.67093	7.70372
Bolivia	19.2137	22.4851	24.1463	25.4496	26.2322
Botswana	7.58406	8.29078	8.55596	8.68979	8.69441
Cambodia	11.1761	12.2877	13.0611	13.719	14.2986
Cameroon	5.62362	6.16453	6.37917	6.49674	6.51804
Chile	73.5102	84.6631	89.5241	92.1418	93.0676
Colombia	63.7936	74.3979	78.8404	82.0428	83.6908
Cote d'Ivoire	9.26283	10.3425	10.9014	11.3087	11.5566
Dem. Rep. Congo	1.91568	2.13189	2.23968	2.31566	2.3586
Egypt	219.613	233.673	241.36	247.242	251.3
Eritrea	0.682665	0.776541	0.833876	0.881264	0.917488
Ethiopia	12.8305	14.7186	15.9394	16.9881	17.8363
Georgia	7.84543	9.36409	10.0993	10.6413	10.9612
Ghana	13.6264	15.2085	16.0242	16.6161	16.9736
Guatemala	15.3339	16.6166	16.9985	17.1138	16.9735
Haiti	2.87719	3.08933	3.13141	3.12381	3.06985
Honduras	8.08721	8.78281	9.00426	9.08511	9.0303
Indonesia	550.336	598.22	627.616	651.857	670.539
Iraq	140.785	155.27	161.66	165.647	167.207
Jordan	20.176	21.6352	21.9011	21.8191	21.4141
Kenya	14.7047	16.3463	17.1538	17.7162	18.0248
Kyrgyzstan	9.70553	10.9659	11.5829	11.9287	12.1271
Lao People's Dem. Rep.	17.4691	19.3041	20.1375	20.6743	20.9096
Lebanon	23.6042	26.5315	28.1524	29.3992	30.2445
Mali	5.07251	5.37718	5.38105	5.29964	5.14181
Mongolia	23.1628	25.013	26.3173	27.387	28.4005
Morocco	52.7531	57.5309	59.229	60.0116	59.8999
Mozambique	5.50696	5.96727	6.10407	6.14512	6.09441
Myanmar	32.6527	38.0224	41.8819	45.188	47.8267
Namibia	3.56338	3.98704	4.21134	4.37781	4.48315
Nepal	11.9421	14.0944	15.4563	16.5525	17.4333
Nicaragua	4.34298	4.69317	4.78768	4.80674	4.75408
Niger	2.07674	2.26107	2.32395	2.35075	2.34248
Nigeria	97.8702	108.452	113.449	116.798	118.456
Oman	62.3221	67.3505	68.7099	68.9867	68.2341
Pakistan	213.322	236.132	250.893	264.051	275.055
Paraguay	8.09773	8.84335	9.25918	9.59169	9.83306
Peru	41.9944	49.7315	52.9092	55.005	55.8115
Philippines	120.475	140.221	150.526	157.857	162.285
Qatar	79.2383	86.2962	88.7214	89.7702	89.4801
Rep. Congo	2.60233	2.84239	2.93079	2.97409	2.97312
Saudi Arabia	462.996	502.344	520.966	536.263	543.894
Senegal	7.18893	7.68195	7.74925	7.69334	7.52419
South Sudan	1.21039	1.33398	1.38788	1.4211	1.43346
Sri Lanka	18.8613	21.0147	21.9305	22.5623	22.8735
Sudan	14.1082	13.037	11.3726	9.76367	8.25762
Tajikistan	6.32593	6.79258	6.88532	6.86882	6.7504
Tanzania	9.73661	10.9143	11.5495	12.0282	12.3403
Turkey	358.48	404.887	430.865	451.679	466.619
Turkmenistan	64.4571	73.4856	79.0884	83.7706	87.4098
Uganda	4.89349	5.54184	5.92474	6.23379	6.46138
United Arab Emirates	171.916	187.221	192.473	194.74	194.102
Viet Nam	246.599	266.989	284.493	302.125	317.58
Zambia	6.52195	7.26074	7.63069	7.8925	8.04184
Sum of emerging emitters	3655.07	4024.93	4217.56	4364.24	4457.39

## Sheet: Severe_2020-2024
Country	2020	2021	2022	2023	2024
Algeria	113.265	100.402	96.2347	94.1214	126.872
Angola	15.2134	13.4042	12.7703	12.4143	16.6329
Armenia	4.2651	3.91915	3.97994	4.09999	6.08591
Azerbaijan	24.3554	21.3256	21.1822	21.4159	31.1565
Bangladesh	85.1912	81.8043	81.2237	81.2814	110.44
Benin	6.11135	5.5241	5.39919	5.38472	7.40147
Bolivia	16.8585	15.3071	15.6449	16.2411	25.0825
Botswana	7.00105	6.30472	6.1392	6.09993	8.3533
Cambodia	10.6851	10.1156	9.64009	9.89155	13.4067
Cameroon	5.19132	4.68782	4.57728	4.56048	6.26231
Chile	66.2485	62.7222	63.1707	64.4569	91.6908
Colombia	56.2513	53.402	54.0486	55.6679	81.2599
Cote d'Ivoire	8.55077	7.86492	7.82217	7.93829	11.1032
Dem. Rep. Congo	1.76841	1.62119	1.60705	1.62551	2.26606
Egypt	211.207	195.698	182.2	180.467	244.405
Eritrea	0.630186	0.590521	0.598336	0.618616	0.881492
Ethiopia	11.8442	11.1928	11.4371	11.925	17.1366
Georgia	6.90104	6.49244	6.65195	6.92093	10.4945
Ghana	12.5789	11.5653	11.4979	11.6639	16.3077
Guatemala	14.1551	12.6361	12.197	12.0133	16.3076
Haiti	2.65601	2.34928	2.2469	2.1928	2.94941
Honduras	7.46552	6.67889	6.46088	6.37743	8.67601
Indonesia	523.918	497.596	499.412	488.491	638.241
Iraq	129.962	118.075	115.997	116.278	160.647
Jordan	18.6251	16.4525	15.7148	15.3163	20.5739
Kenya	13.5743	12.4305	12.3085	12.4362	17.3176
Kyrgyzstan	9.08667	8.14559	8.27248	8.46408	11.8311
Lao People's Dem. Rep.	16.1262	14.6798	14.4494	14.5126	20.0893
Lebanon	21.7896	20.1759	20.2003	20.6372	29.0579
Mali	4.68257	4.08908	3.86109	3.72016	4.94007
Mongolia	22.7886	20.0591	19.7562	20.0293	26.801
Morocco	48.6978	43.7494	42.4989	42.1261	57.5498
Mozambique	5.08363	4.53781	4.37989	4.31366	5.8553
Myanmar	30.1479	28.92	30.0575	31.7234	45.9503
Namibia	3.28945	3.03195	3.02179	3.07307	4.30726
Nepal	10.7793	10.5362	10.9521	11.4984	16.1504
Nicaragua	4.00912	3.56892	3.43533	3.37416	4.56756
Niger	1.91709	1.71943	1.66752	1.65014	2.25057
Nigeria	90.3466	82.472	81.4038	81.9878	113.808
Oman	57.5313	51.2167	49.3018	48.4262	65.557
Pakistan	200.562	188.887	193.541	199.978	258.736
Paraguay	7.62603	7.39019	7.05415	6.83819	9.45095
Peru	36.4413	32.8102	32.7347	33.792	54.5469
Philippines	107.256	94.1382	96.2217	99.792	155.83
Qatar	73.147	65.624	63.6607	63.0155	85.9694
Rep. Congo	2.40228	2.1615	2.10295	2.0877	2.85647
Saudi Arabia	430.806	396.599	400.946	408.611	532.417
Senegal	6.63629	5.84174	5.56036	5.40045	7.22899
South Sudan	1.11734	1.01442	0.995855	0.99756	1.37722
Sri Lanka	17.3896	16.272	16.4382	16.8113	22.3908
Sudan	13.0237	9.91396	8.16027	6.85375	7.93364
Tajikistan	5.83964	5.16542	4.94047	4.82167	6.48555
Tanzania	8.98813	8.29979	8.28721	8.44338	11.8562
Turkey	329.068	316.369	320.686	331.771	444.978
Turkmenistan	59.5021	55.8821	56.7488	58.804	83.9804
Uganda	4.51731	4.21429	4.25121	4.3759	6.20787
United Arab Emirates	158.701	142.372	138.106	136.701	186.486
Viet Nam	235.766	209.063	206.57	213.479	294.98
Zambia	6.02059	5.52143	5.47529	5.54026	7.72632
Sum of emerging emitters	3403.63	3141.43	3121.24	3147.4	4271.64
